# Supplementary material for: Bismuth Subnitrate-Catalyzed Markovnikov-Type Alkyne Hydrations under Batch and Continuous Flow Conditions
Source: MDPI journal article supplement (doi:10.3390/molecules26102864), 2021-05-12
Supplement: s1 [file s1]

# Supporting Information

for

## **Bismuth Subnitrate-Catalyzed Markovnikov-type Alkyne Hydrations under Batch and Continuous Flow Conditions**

*Zsanett Szécsényi<sup>1</sup>, Ferenc Fülöp<sup>1,2,\*</sup> and Sándor B. Ötvös<sup>2,3,\*</sup>*

<sup>1</sup> *Institute of Pharmaceutical Chemistry, University of Szeged, Interdisciplinary Excellence Center, Eötvös u. 6, Szeged, H-6720 Hungary.*

<sup>2</sup> *MTA-SZTE Stereochemistry Research Group, Hungarian Academy of Sciences, Interdisciplinary Excellence Center, Eötvös u. 6, Szeged, H-6720.*

<sup>3</sup> *Institute of Chemistry, University of Graz, NAWI Graz, Heinrichstrasse 28, Graz, A-8010 Austria.*

*\*Correspondence: fulop@pharm.u-szeged.hu (FF), sandor.oetvoes@uni-graz.at (SBO)*

## Table of Contents

|                                              |    |
|----------------------------------------------|----|
| 1. Analytical data of reaction products..... | 3  |
| 2. Collection of NMR spectra.....            | 8  |
| 3. References .....                          | 30 |

## 1. Analytical data of reaction products

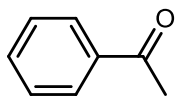

### Acetophenone:

$^1\text{H}$  NMR (500 MHz,  $\text{CDCl}_3$ )  $\delta$  7.97 (d,  $J = 7.0$  Hz, 2H), 7.57 (t,  $J = 7.4$  Hz, 1H), 7.47 (t,  $J = 7.8$  Hz, 2H), 2.62 (s, 3H) ppm

$^{13}\text{C}$  NMR (126 MHz,  $\text{CDCl}_3$ )  $\delta$  198.4, 137.3, 133.3, 128.7, 128.5, 26.8 ppm

MS (EI)  $m/z = 120.08, 105.04, 77.06, 51.05$

NMR data is in agreement with the published data.<sup>1</sup>

(Column chromatography in *n*-hexane/EtOAc 4:1 as eluent.)

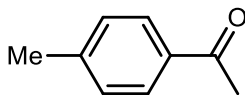

### 4-Methyl-acetophenone:

$^1\text{H}$  NMR (500 MHz,  $\text{CDCl}_3$ ) 7.86 (d,  $J = 8.1$  Hz, 2H), 7.26 (d,  $J = 8.0$  Hz, 2H), 2.58 (s, 3H), 2.41 (s, 3H) ppm

$^{13}\text{C}$  NMR (126 MHz,  $\text{CDCl}_3$ ) 197.9, 143.9, 134.7, 129.3, 128.5, 26.6, 21.7 ppm

MS (EI)  $m/z = 134.08, 119.07, 91.06, 77.05, 65.04$

NMR data is in agreement with the published data.<sup>2</sup>

(Column chromatography in *n*-hexane/EtOAc 2:1 as eluent.)

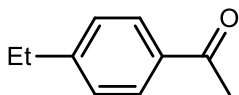

### 4-Ethyl-acetophenone:

$^1\text{H}$  NMR (500 MHz,  $\text{CDCl}_3$ )  $\delta$  7.89 (d,  $J = 8.3$  Hz, 2H), 7.28 (d,  $J = 8.0$  Hz, 2H), 2.71 (q,  $J = 7.6$  Hz, 2H), 2.58 (s, 3H), 1.26 (t,  $J = 7.6$  Hz, 3H)

$^{13}\text{C}$  NMR (126 MHz,  $\text{CDCl}_3$ ) 197.9, 150.1, 134.9, 128.6, 128.1, 29.0, 26.6, 15.2 ppm

MS (EI)  $m/z$  148.08, 133.07, 105.04, 91.05, 77.06, 63.07

NMR data is in agreement with the published data.<sup>3</sup>

(Column chromatography in *n*-hexane/EtOAc 2:1 as eluent.)

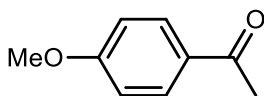

### 4-Methoxy-acetophenone:

$^1\text{H}$  NMR (500 MHz,  $\text{CDCl}_3$ )  $\delta$  7.94 (d,  $J$  = 8.9 Hz, 2H), 6.93 (d,  $J$  = 9.0 Hz, 2H), 3.87 (s, 3H), 2.56 (s, 3H) ppm  
 $^{13}\text{C}$  NMR (126 MHz,  $\text{CDCl}_3$ ) 196.8, 163.5, 130.6, 130.3, 113.7, 55.5, 26.4 ppm  
 MS (EI)  $m/z$  = 150.08, 135.06, 107.05, 92.03, 77.04, 63.03  
 NMR data is in agreement with the published data.<sup>2</sup>

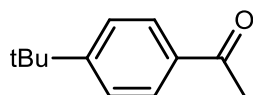

#### 4-*tert*Buthyl-acetophenone:

$^1\text{H}$  NMR (500 MHz,  $\text{CDCl}_3$ )  $\delta$  7.90 (d,  $J$  = 8.5 Hz, 2H), 7.48 (d,  $J$  = 8.5 Hz, 2H), 2.58 (s, 3H), 1.34 (s, 9H) ppm  
 $^{13}\text{C}$  NMR (126 MHz,  $\text{CDCl}_3$ )  $\delta$  197.9, 156.8, 134.6, 128.3, 125.5, 35.1, 31.1, 26.6 ppm  
 MS (EI)  $m/z$  = 176.12, 161.11, 146.09, 133.09, 115.09, 105.07, 91.06, 77.06, 51.03  
 NMR data is in agreement with the published data.<sup>2</sup>  
 (Column chromatography in *n*-hexane/EtOAc 9:1 as eluent.)

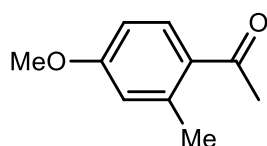

#### 4-Methoxy-2-methylacetophenone

$^1\text{H}$  NMR (500 MHz,  $\text{CDCl}_3$ )  $\delta$  7.76 (d,  $J$  = 8.3 Hz, 1H), 6.75 (d,  $J$  = 8.3 Hz, 2H), 3.84 (s, 3H), 2.57 (s, 3H), 2.55 (s, 3H) ppm  
 $^{13}\text{C}$  NMR (126 MHz,  $\text{CDCl}_3$ )  $\delta$  199.5, 162.0, 142.3, 132.6, 130.0, 117.5, 110.6, 55.3, 29.1, 22.7 ppm  
 MS (EI)  $m/z$  = 164.10, 149.08, 121.07, 105.06, 91.07, 77.07, 51.03  
 NMR data is in agreement with the published data.<sup>5,6</sup>  
 (Column chromatography in *n*-hexane/EtOAc 1:1 as eluent.)

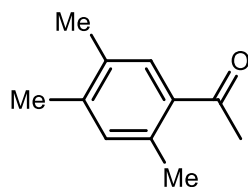

#### 2,4,5-Trimethylacetophenone

$^1\text{H}$  NMR (500 MHz,  $\text{CDCl}_3$ )  $\delta$  7.48 (s, 1H), 6.99 (s, 1H), 2.55 (s, 3H), 2.47 (s, 3H), 2.26 (s, 3H), 2.25 (s, 3H) ppm

$^{13}\text{C}$  NMR (126 MHz,  $\text{CDCl}_3$ )  $\delta$  201.2, 140.8, 136.2, 135.0, 133.7, 133.5, 131.1, 29.4, 21.3, 19.7, 19.3 ppm

MS (EI)  $m/z$  = 162.12, 147.09, 119.10, 103.08, 91.06, 77.04, 51.03

NMR data is in agreement with the published data.<sup>7</sup>

(Column chromatography in *n*-hexane/EtOAc 9:1 as eluent.)

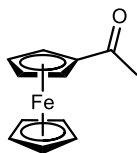

### Acetylferrocene:

$^1\text{H}$  NMR (500 MHz,  $\text{CDCl}_3$ )  $\delta$  4.76 (t,  $J$  = 2.0 Hz, 2H), 4.50 – 4.47 (m, 2H), 4.19 (s, 5H), 2.38 (s, 3H) ppm

$^{13}\text{C}$  NMR (126 MHz,  $\text{CDCl}_3$ )  $\delta$  202.2, 79.3, 72.4, 69.9, 69.7, 27.5 ppm

MS (EI)  $m/z$  = 228.03, 213.01, 184.99, 163.01, 129.08, 120.97, 93.97, 80.95, 65.05, 55.93

NMR data is in agreement with the published data.<sup>9</sup>

(Column chromatography in *n*-hexane/EtOAc 2:1 as eluent.)

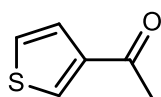

### 3-Acetylthiophene:

$^1\text{H}$  NMR (500 MHz,  $\text{CDCl}_3$ )  $\delta$  8.04 (dd,  $J$  = 3.0, 1.3 Hz, 1H), 7.54 (dd,  $J$  = 5.1, 1.3 Hz, 1H), 7.31 (dd,  $J$  = 5.2, 2.9 Hz, 1H), 2.53 (s, 3H) ppm

$^{13}\text{C}$  NMR (126 MHz,  $\text{CDCl}_3$ )  $\delta$  192.3, 142.6, 132.4, 127.0, 126.4, 27.6 ppm

MS (EI)  $m/z$  = 126.02, 111.00, 82.99

NMR data is in agreement with the published data.<sup>8</sup>

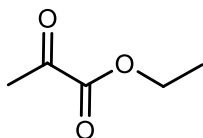

### Ethyl-pyruvate:

$^1\text{H}$  NMR (500 MHz,  $\text{CDCl}_3$ )  $\delta$  4.32 (q,  $J$  = 7.2 Hz, 2H), 2.47 (d,  $J$  = 1.1 Hz, 3H), 1.37 (d,  $J$  = 14.4 Hz, 3H) ppm

$^{13}\text{C}$  NMR (126 MHz,  $\text{CDCl}_3$ )  $\delta$  191.85, 160.72, 62.2, 26.4, 13.8 ppm

MS (EI)  $m/z$  = 116.1, 73.1, 61.1

NMR data is in agreement with the published data.<sup>10</sup>

(Column chromatography in *n*-hexane/EtOAc 1:1 as eluent.)

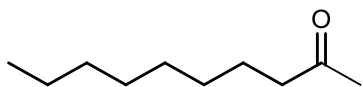

**2-Decanone:**

$^1\text{H}$  NMR (500 MHz,  $\text{CDCl}_3$ )  $\delta$  2.42 (t,  $J = 7.5$  Hz, 2H), 2.13 (s, 3H), 1.55 (dd,  $J = 16.8, 10.9$  Hz, 2H), 1.28 – 1.26 (m, 10H), 0.88 (t,  $J = 6.8$  Hz, 3H).

$^{13}\text{C}$  NMR (126 MHz,  $\text{CDCl}_3$ ) 209.6, 43.8, 31.8, 29.9, 29.4, 29.2, 29.1, 23.9, 22.6, 14.1 ppm

MS (EI)  $m/z = 156.16, 141.15, 113.11, 96.12, 85.09, 71.07, 58.05$

NMR data is in agreement with the published data.<sup>11</sup>

(Column chromatography in *n*-hexane/EtOAc 1:2 as eluent.)

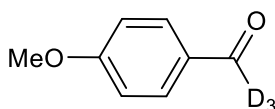

**1-(4-methoxyphenyl)ethan-1-one-2,2,2- $d_3$ :**

$^1\text{H}$  NMR (500 MHz,  $\text{CDCl}_3$ )  $\delta$  7.91 (d, 2H), 6.91 (d, 2H), 3.85 (s, 3H) ppm

$^{13}\text{C}$  NMR (126 MHz,  $\text{CDCl}_3$ )  $\delta$  196.8, 163.4, 130.5, 130.2, 113.5, 55.4, 25.5 ppm

MS (EI)  $m/z = 153.14, 135.08, 107.10, 92.04, 77.08, 64.08$

$^1\text{H}$  NMR data is in agreement with the published data.<sup>12</sup>

(Column chromatography in *n*-hexane/EtOAc 4:1 as eluent.)

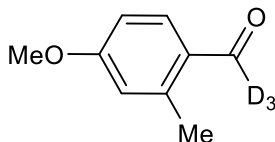

**1-(4-methoxy-2-methylphenyl)ethan-1-one-2,2,2- $d_3$ :**

$^1\text{H}$  NMR (500 MHz,  $\text{CDCl}_3$ )  $\delta$  7.74 (d, 1H), 6.75 (d, 2H), 3.84 (s, 3H), 2.57 (s, 3H) ppm

$^{13}\text{C}$  NMR (126 MHz,  $\text{CDCl}_3$ )  $\delta$  199.5, 161.9, 142.2, 132.4, 130.0, 117.5, 110.5, 55.3, 28.1, 22.4 ppm

MS (EI)  $m/z = 167.15, 149.11, 91.11, 77.11$

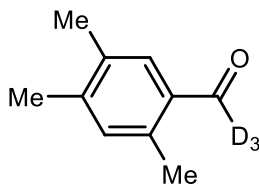

**1-(2,4,5-trimethylphenyl)ethan-1-one-2,2,2- $d_3$ :**

$^1\text{H}$  NMR (500 MHz,  $\text{CDCl}_3$ )  $\delta$  7.47 (s, 1H), 7.00 (s, 1H), 2.47 (s, 3H), 2.27 (s, 6H) ppm

$^{13}\text{C}$  NMR (126 MHz,  $\text{CDCl}_3$ )  $\delta$  200.9, 140.7, 136.1, 135.2, 133.6, 133.5, 131.0, 31.5, 21.0, 19.5, 19.1 ppm

MS (EI)  $m/z$  = 165.19, 147.13, 119.15, 91.10, 77.10

(Column chromatography in *n*-hexane/EtOAc 9:1 as eluent.)

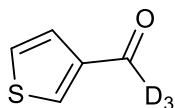

**1-(thiophen-3-yl)ethan-1-one-2,2,2-*d*3:**

$^1\text{H}$  NMR (500 MHz,  $\text{CDCl}_3$ )  $\delta$  8.03 (dd,  $J$  = 3.0, 1.3 Hz, 1H), 7.54 (dd,  $J$  = 5.1, Hz, 1H), 7.31 (dd,  $J$  = 5.1, 2.9 Hz, 1 H) ppm

$^{13}\text{C}$  NMR (126 MHz,  $\text{CDCl}_3$ )  $\delta$  192.4, 142.6, 132.3, 126.9, 126.3, 29.7 ppm

MS (EI)  $m/z$  = 129.06, 128.04, 111.01, 83.08

(Column chromatography in *n*-hexane/EtOAc 2:1 as eluent.)

## **2. Collection of NMR spectra**



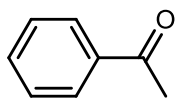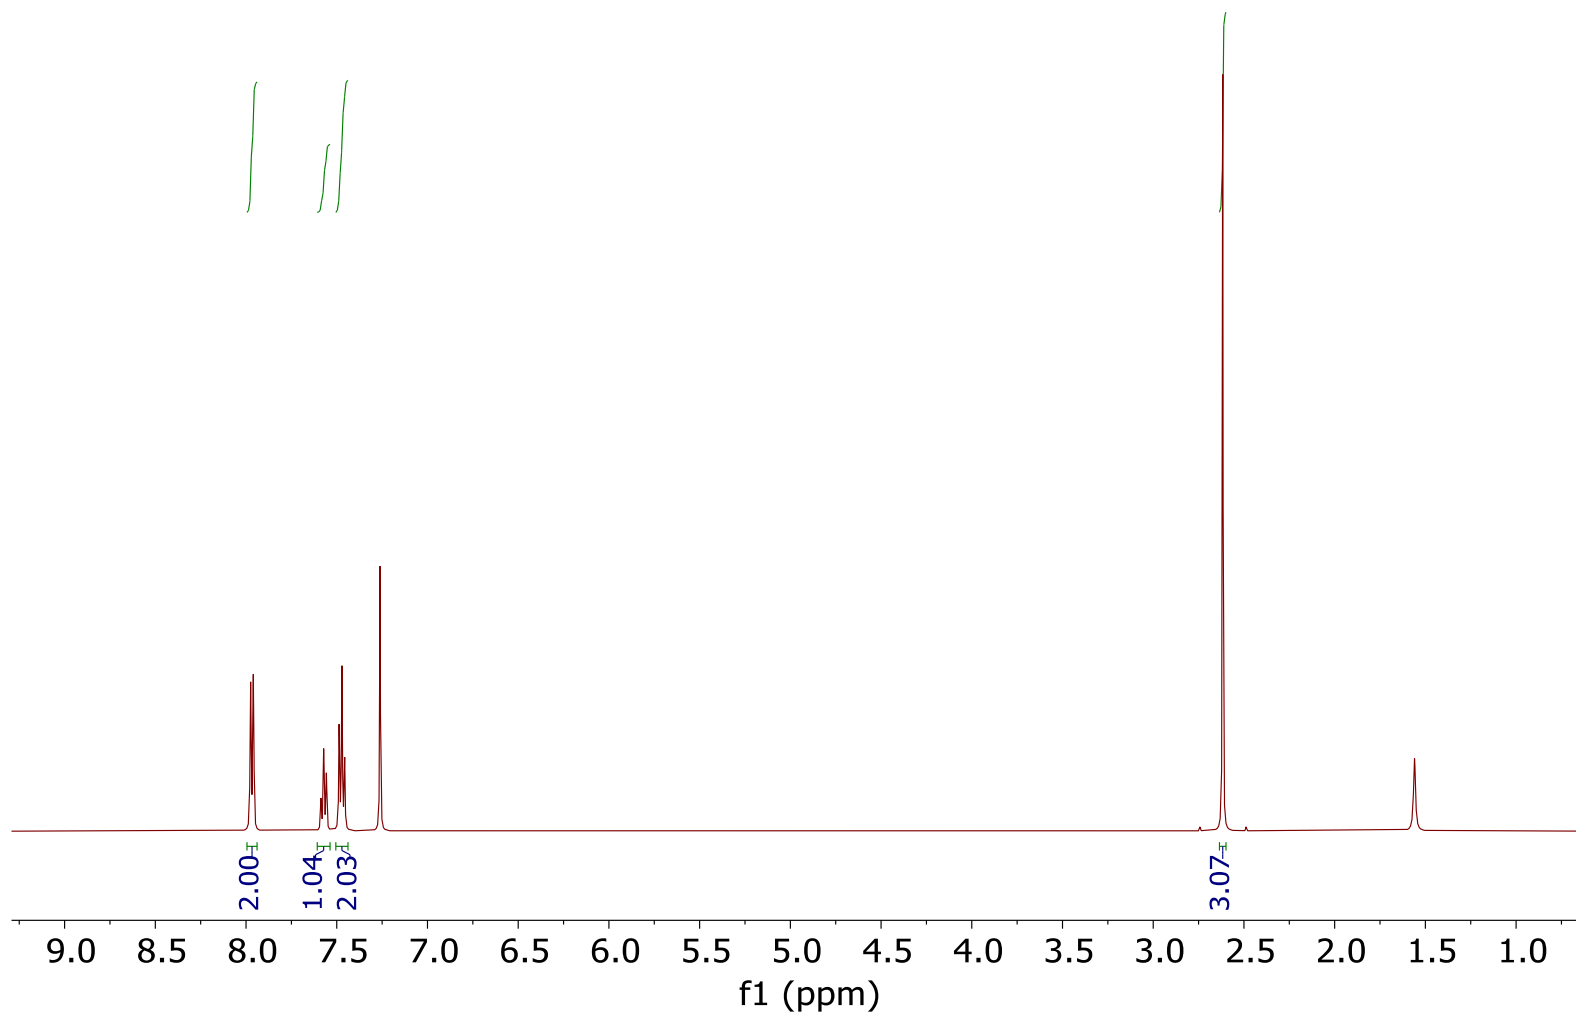

**Figure S1.**  $^1\text{H}$  NMR spectrum of acetophenone in  $\text{CDCl}_3$ .

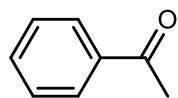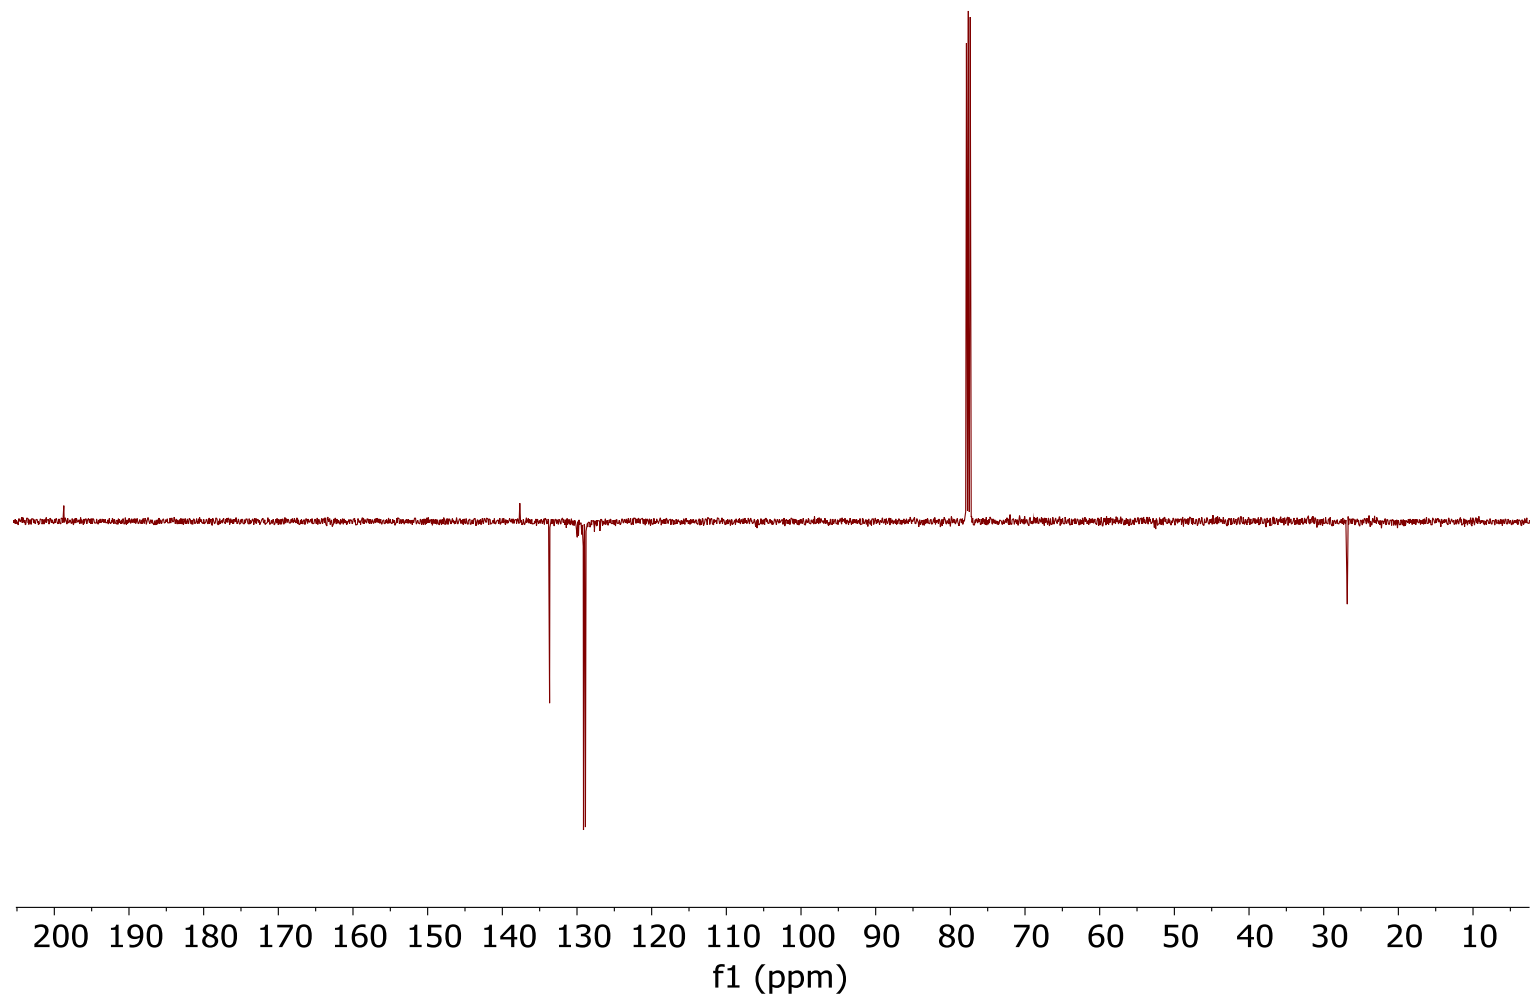

**Figure S2.**  $^{13}\text{C}$  NMR spectrum of acetophenone in  $\text{CDCl}_3$ .

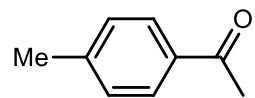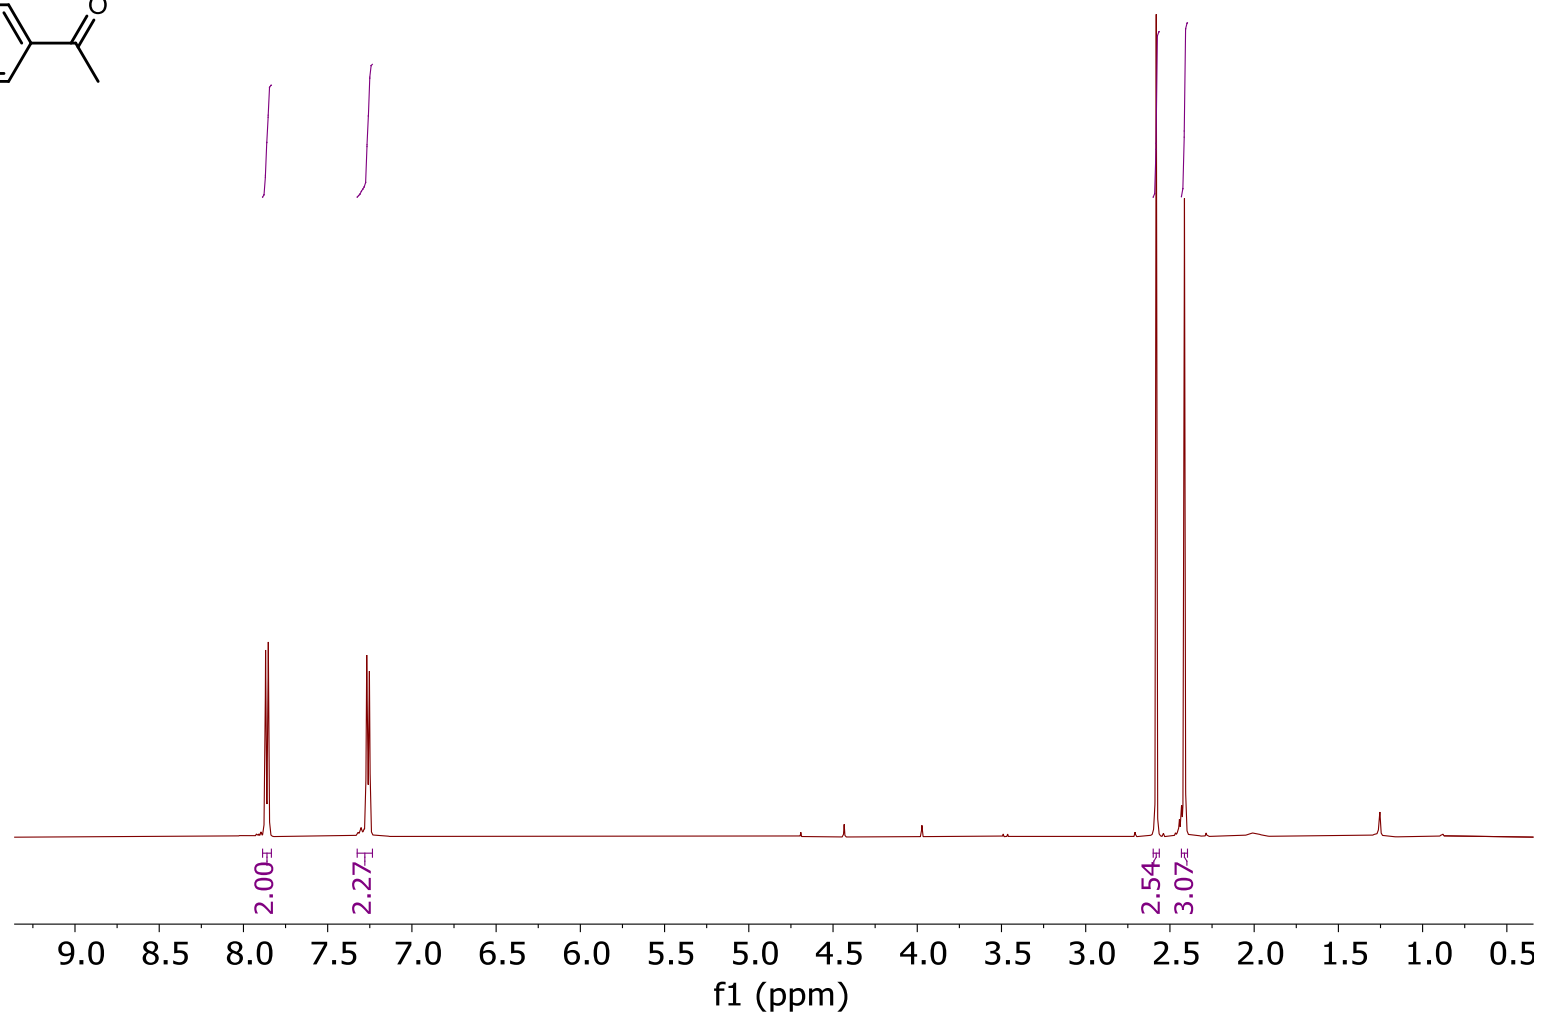

**Figure S3.**  $^1\text{H}$  NMR spectrum of 4-methylacetophenone in  $\text{CDCl}_3$ .

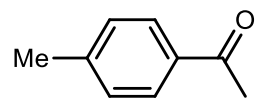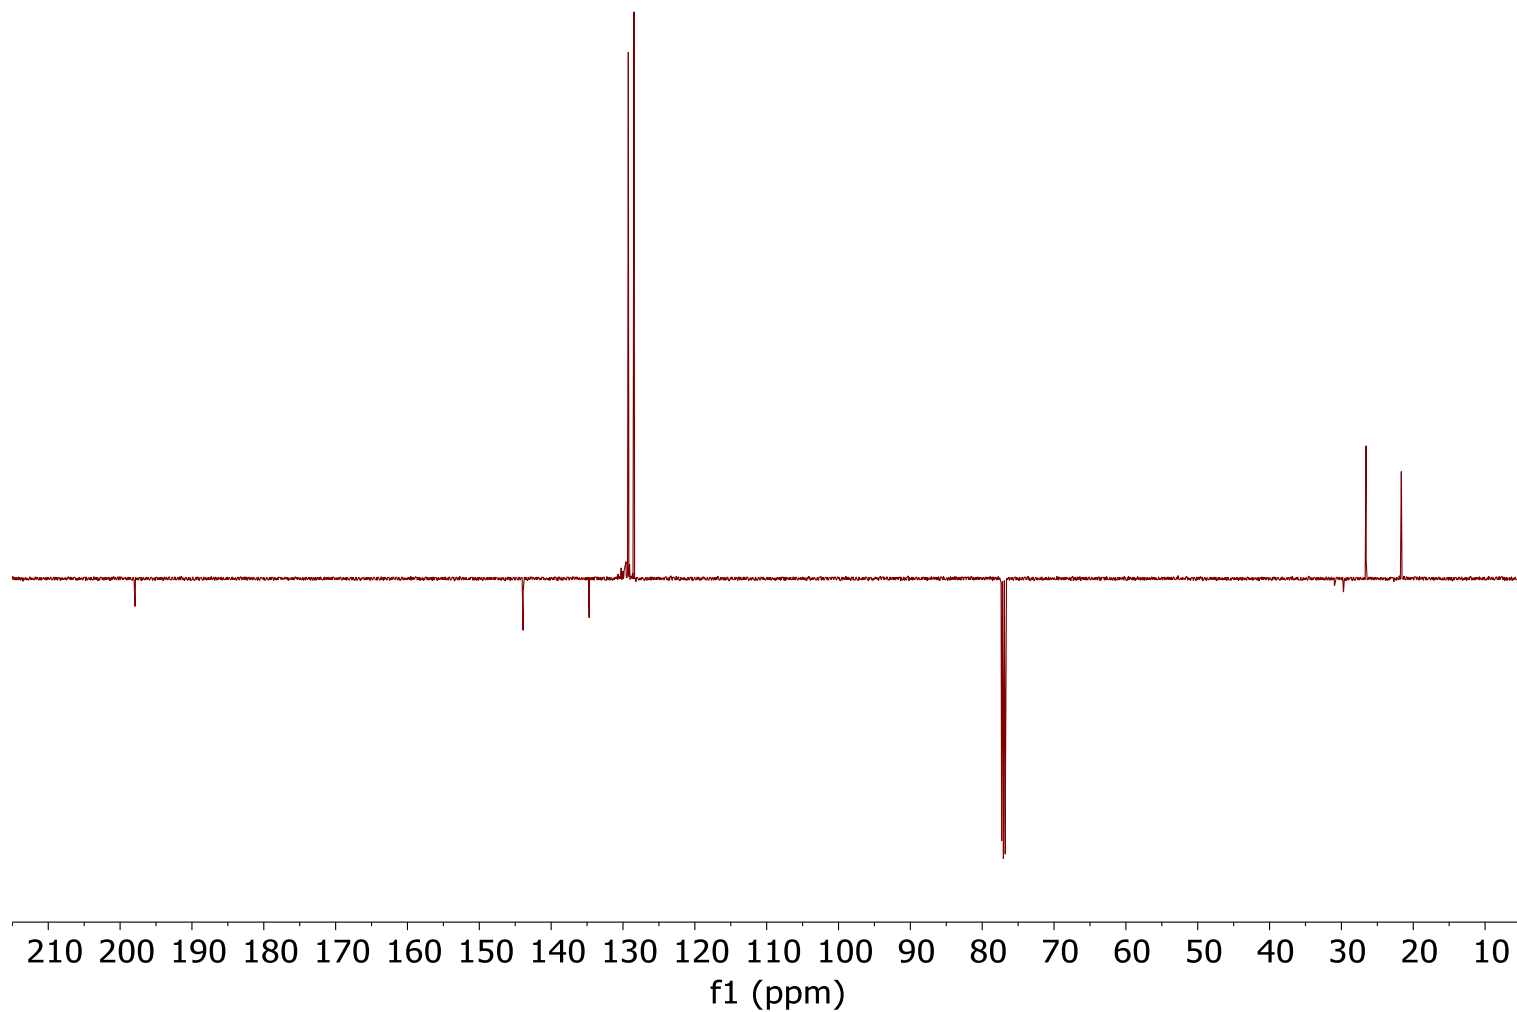

**Figure S4.**  $^{13}\text{C}$  NMR spectrum of 4-methylacetophenone in  $\text{CDCl}_3$ .

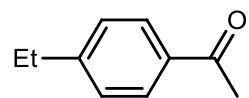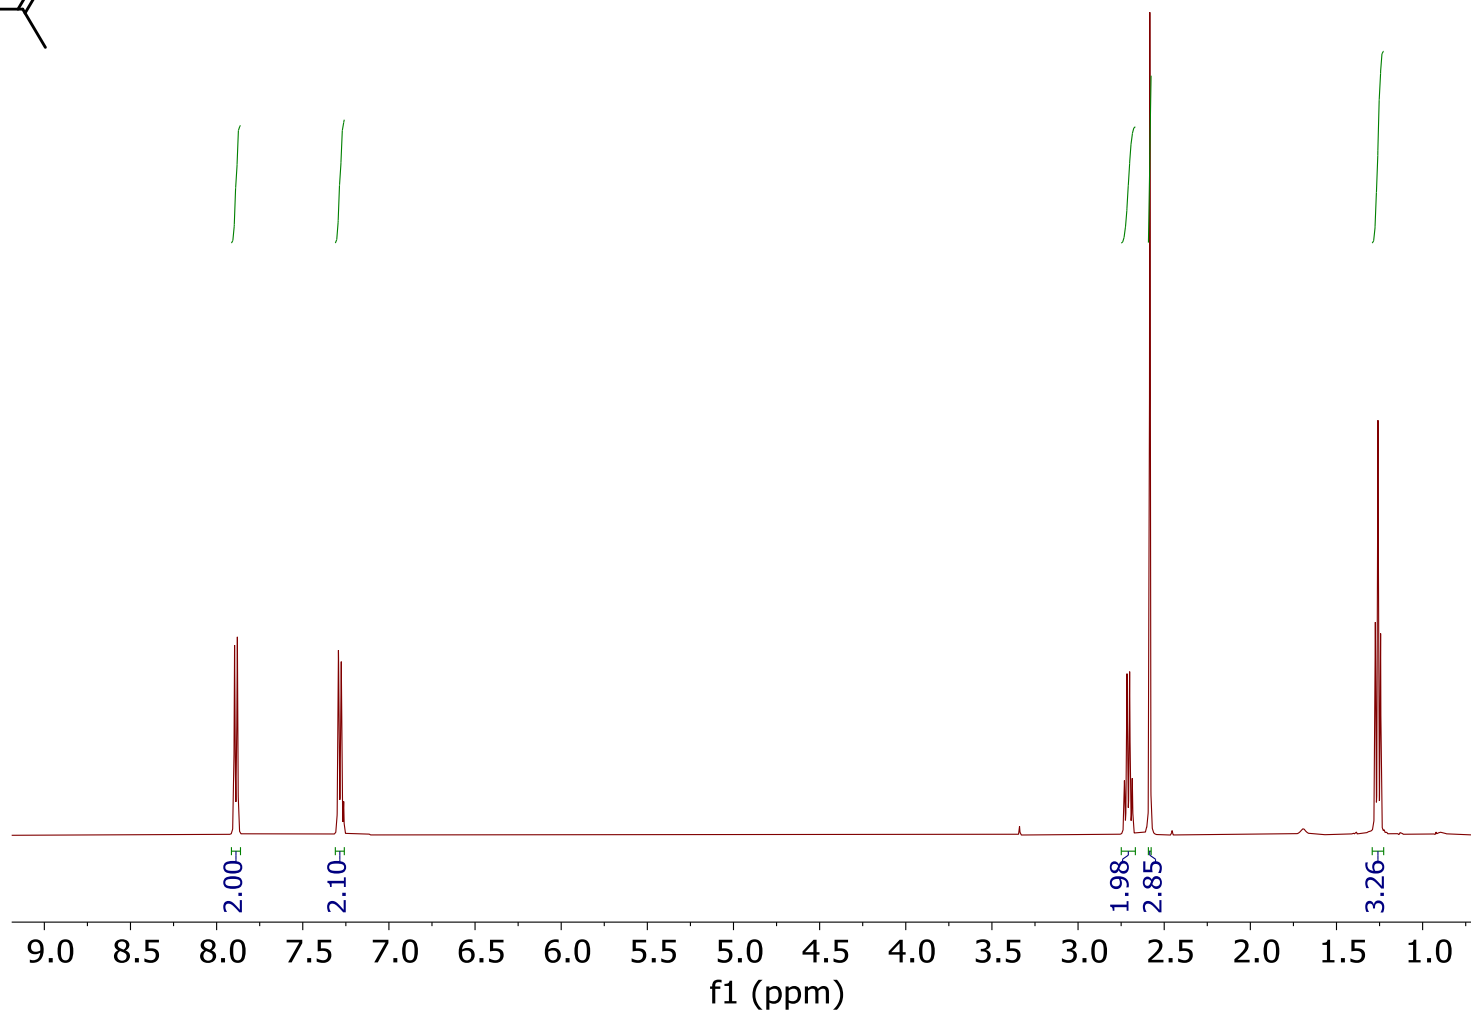

**Figure S5.**  $^1\text{H}$  NMR spectrum of 4-ethylacetophenone in  $\text{CDCl}_3$ .

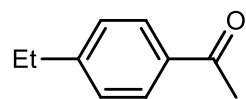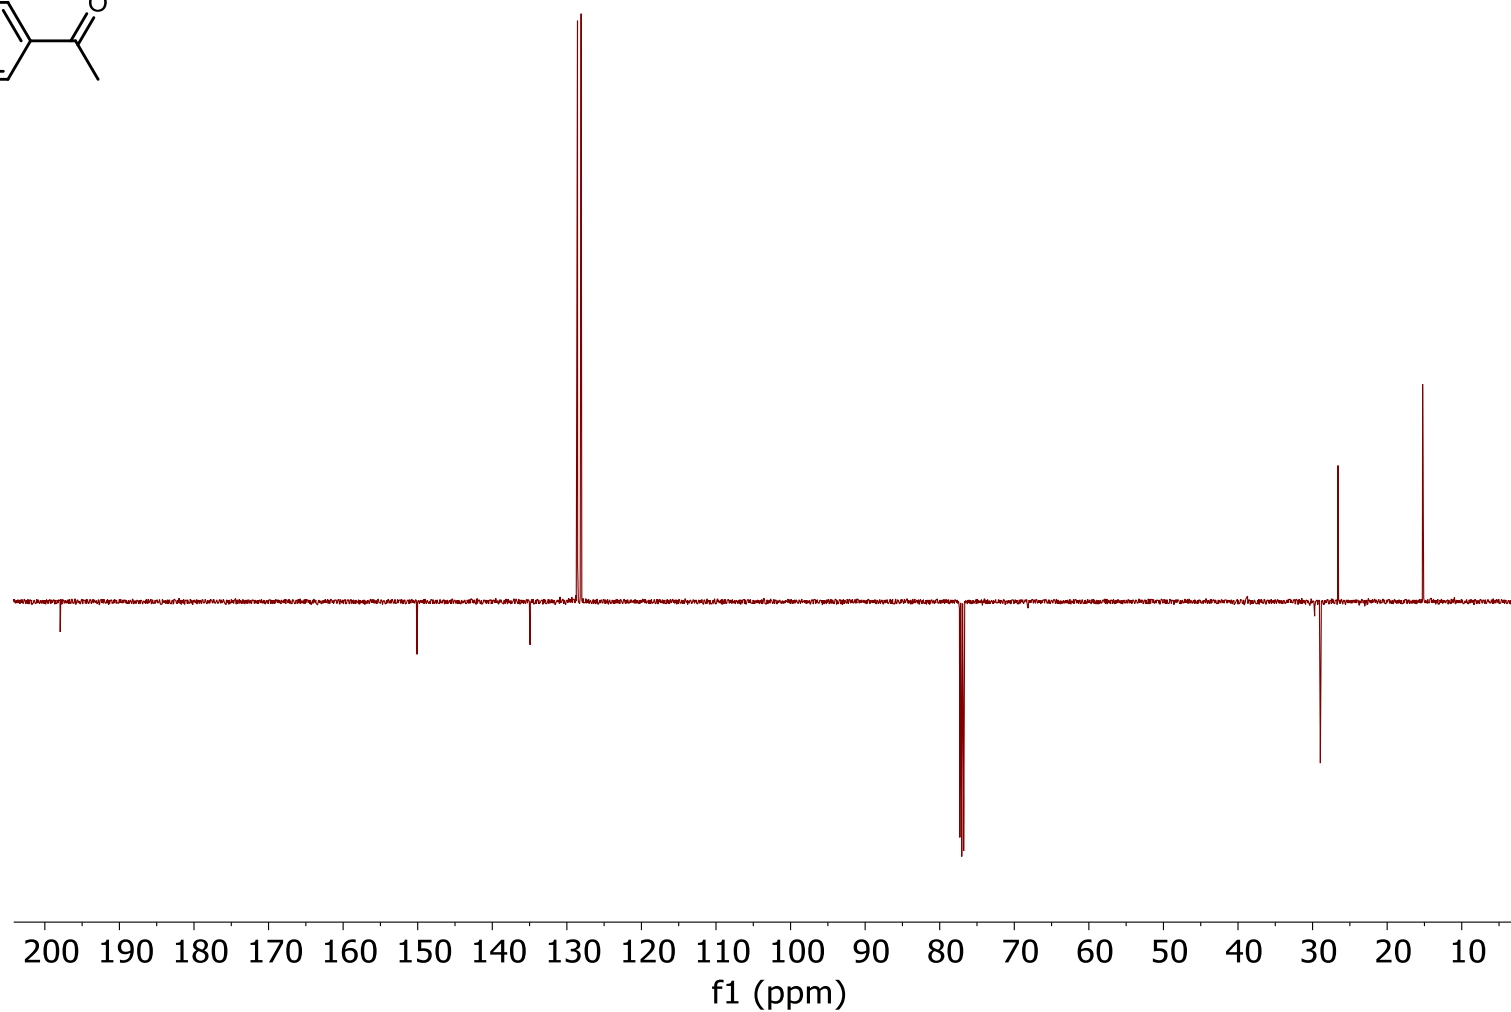

**Figure S6.**  $^{13}\text{C}$  NMR spectrum of 4-ethylacetophenone in  $\text{CDCl}_3$ .

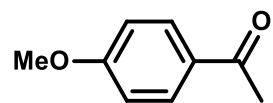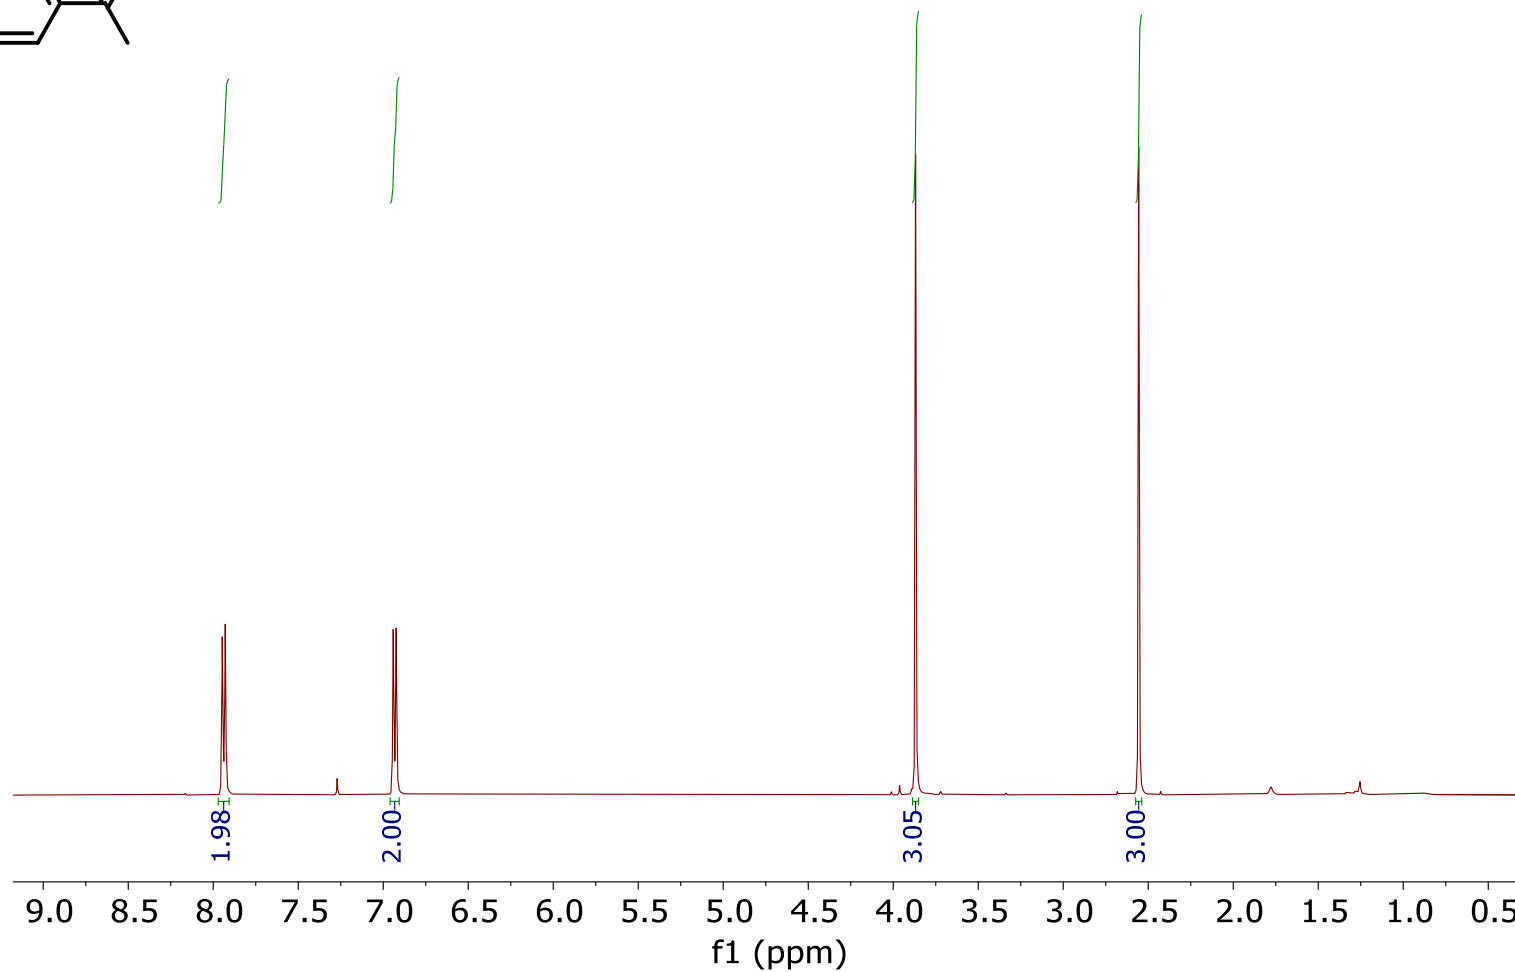

**Figure S7.**  $^1\text{H}$  NMR spectrum of 4-methoxyacetophenone in  $\text{CDCl}_3$ .

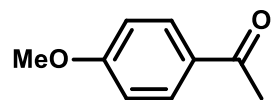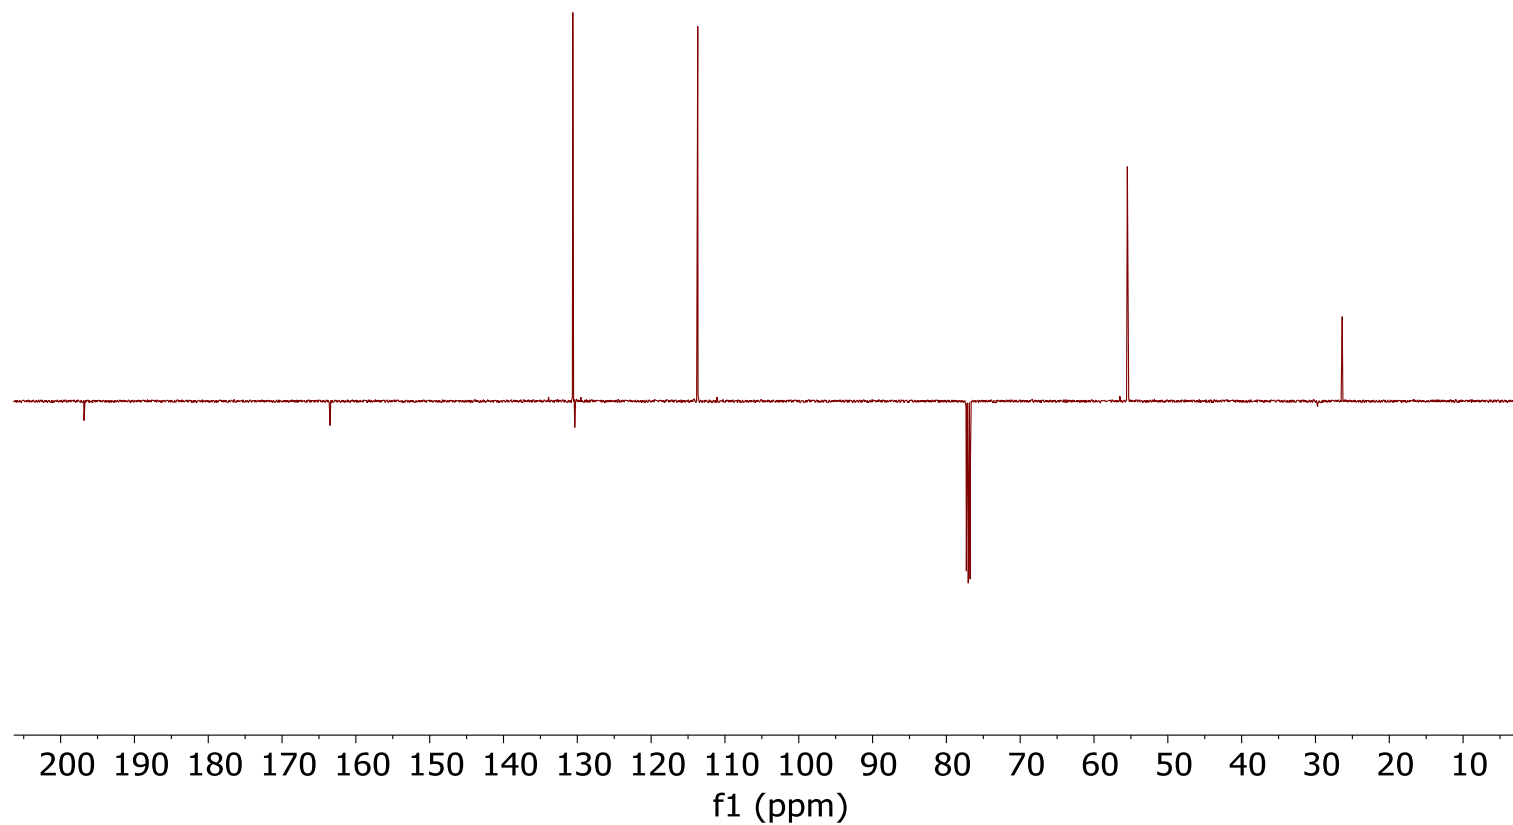

**Figure S8.**  $^{13}\text{C}$  NMR spectrum of 4-methoxyacetophenone in  $\text{CDCl}_3$ .



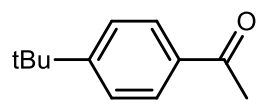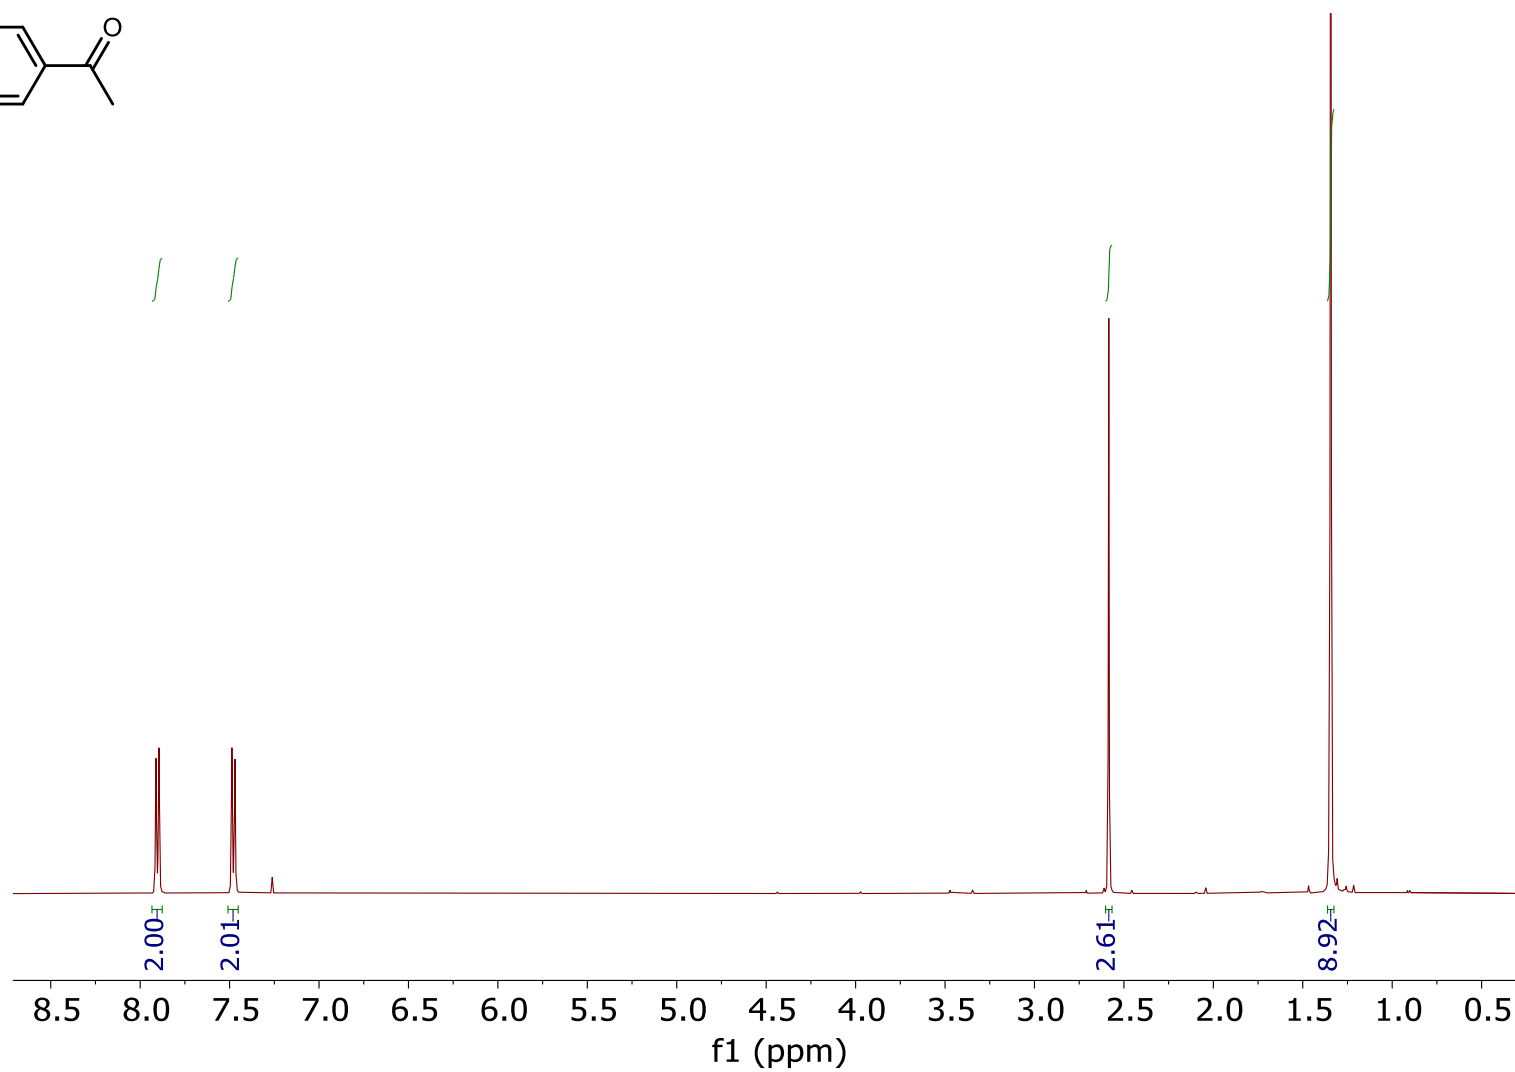

**Figure S9.**  $^1\text{H}$  NMR spectrum of 4-*tert*-butylacetophenone in  $\text{CDCl}_3$ .

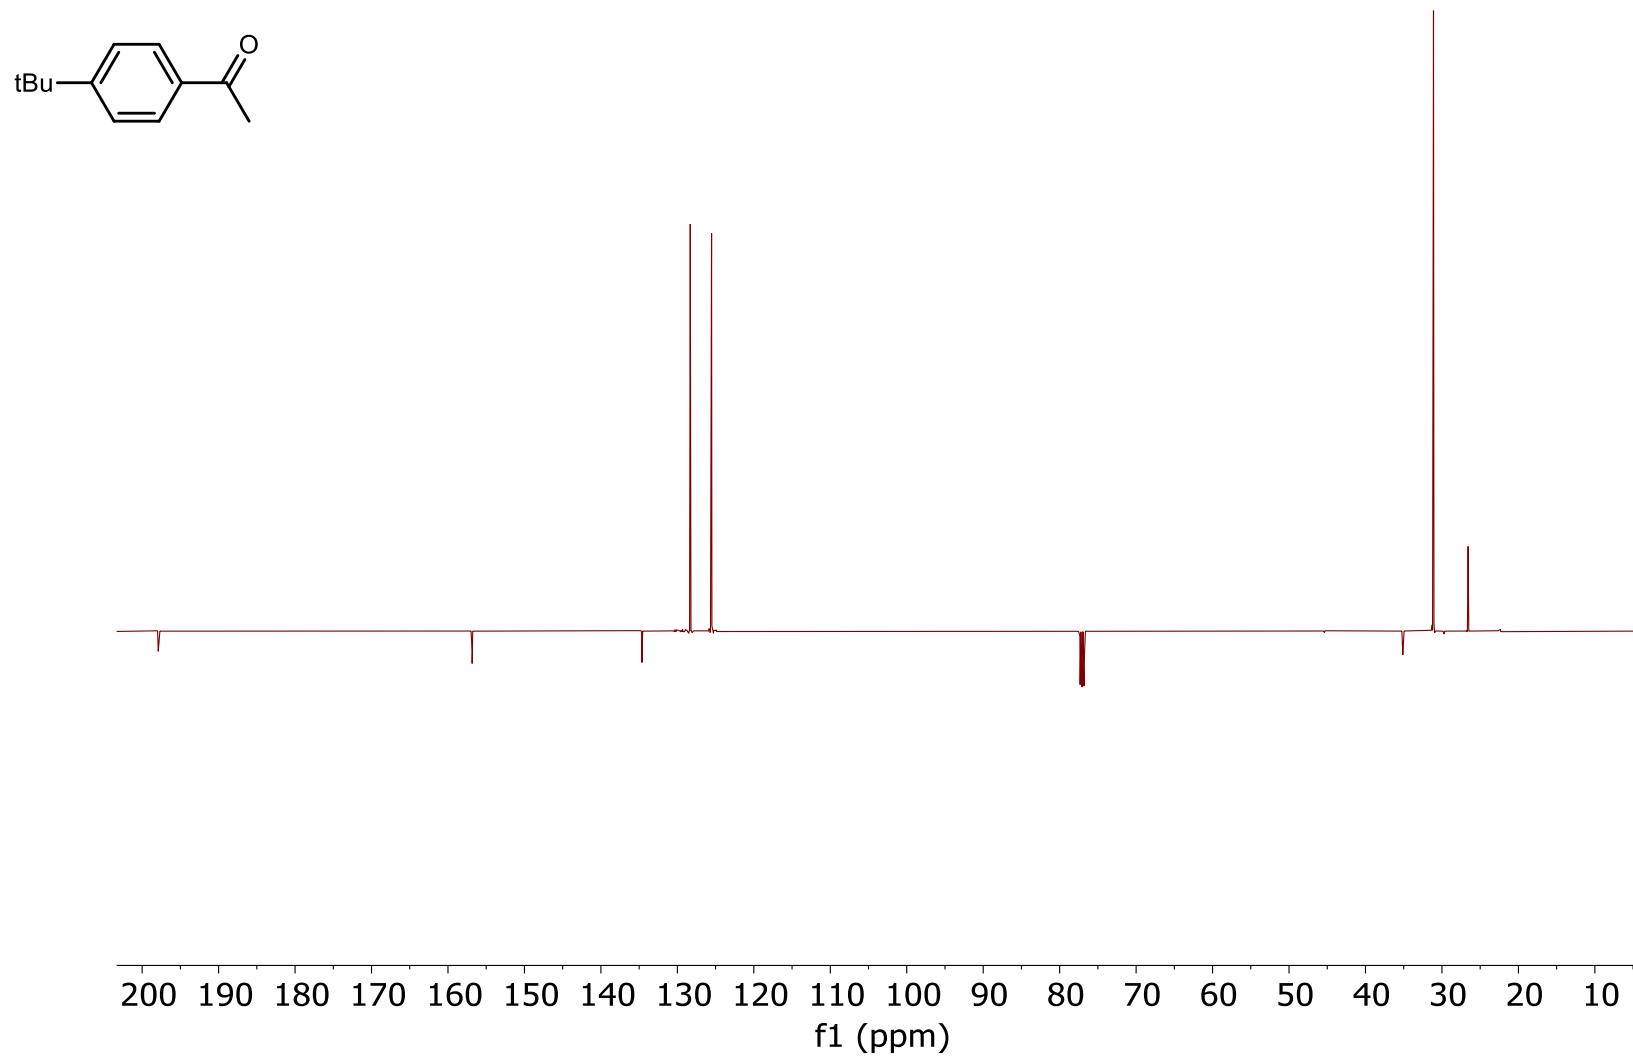

**Figure S10.**  $^{13}\text{C}$  NMR spectrum of 4-*tert*-butylacetophenone in  $\text{CDCl}_3$ .

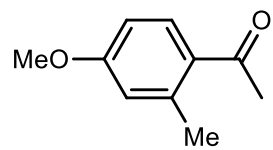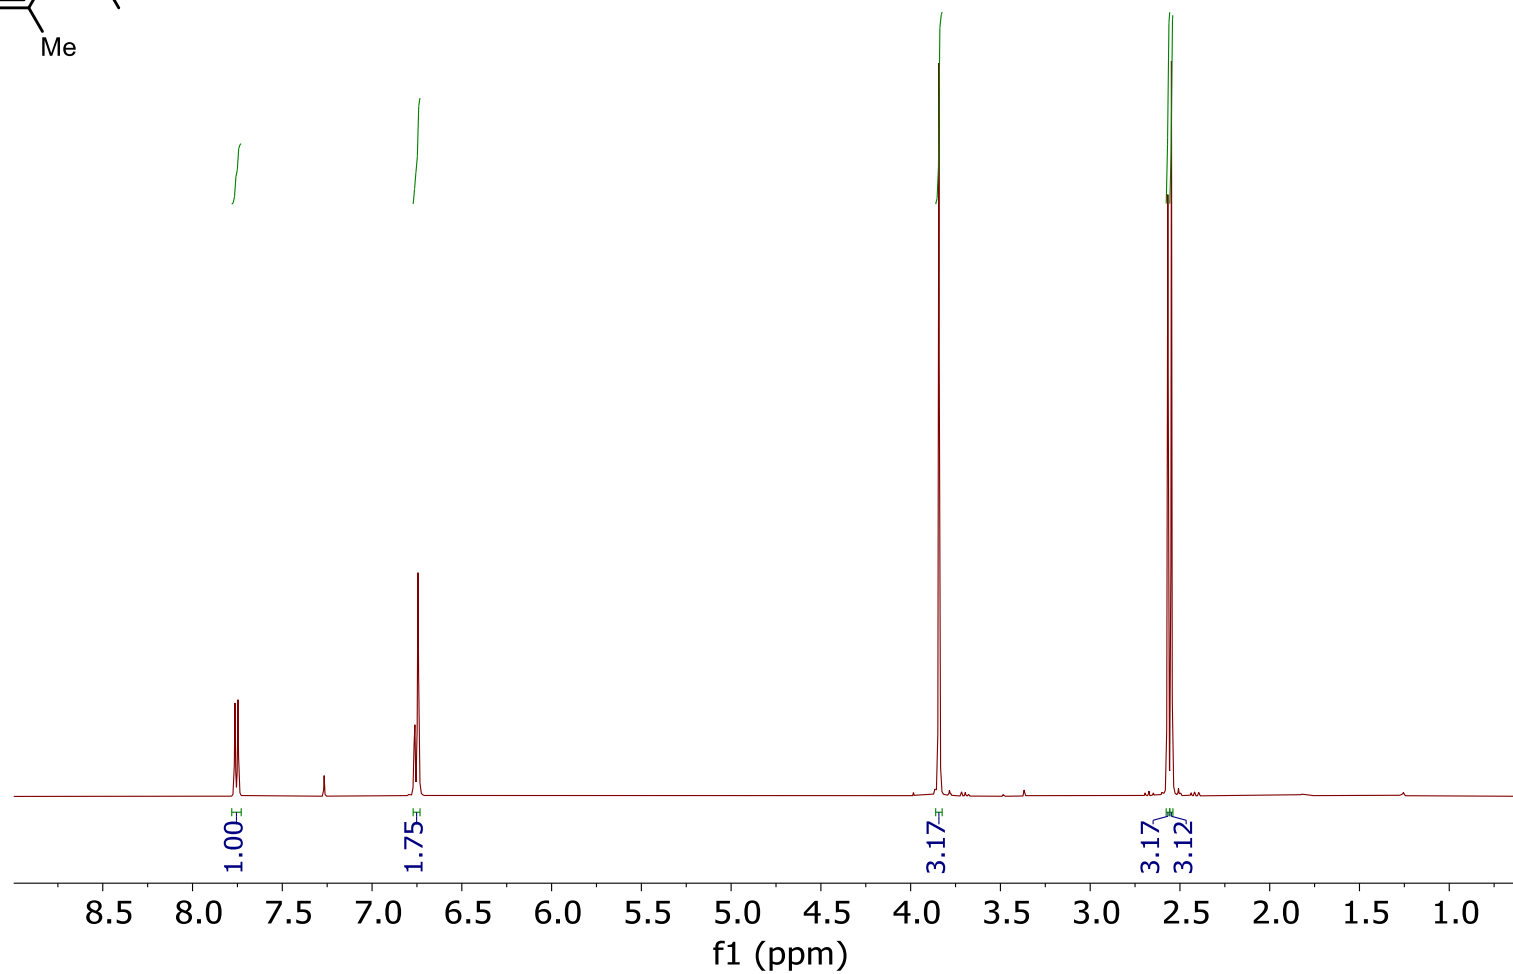

**Figure S11.**  $^1\text{H}$  NMR spectrum of 4-methoxy-2-methylacetophenone in  $\text{CDCl}_3$ .

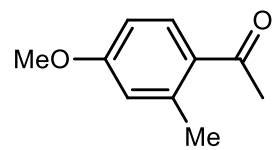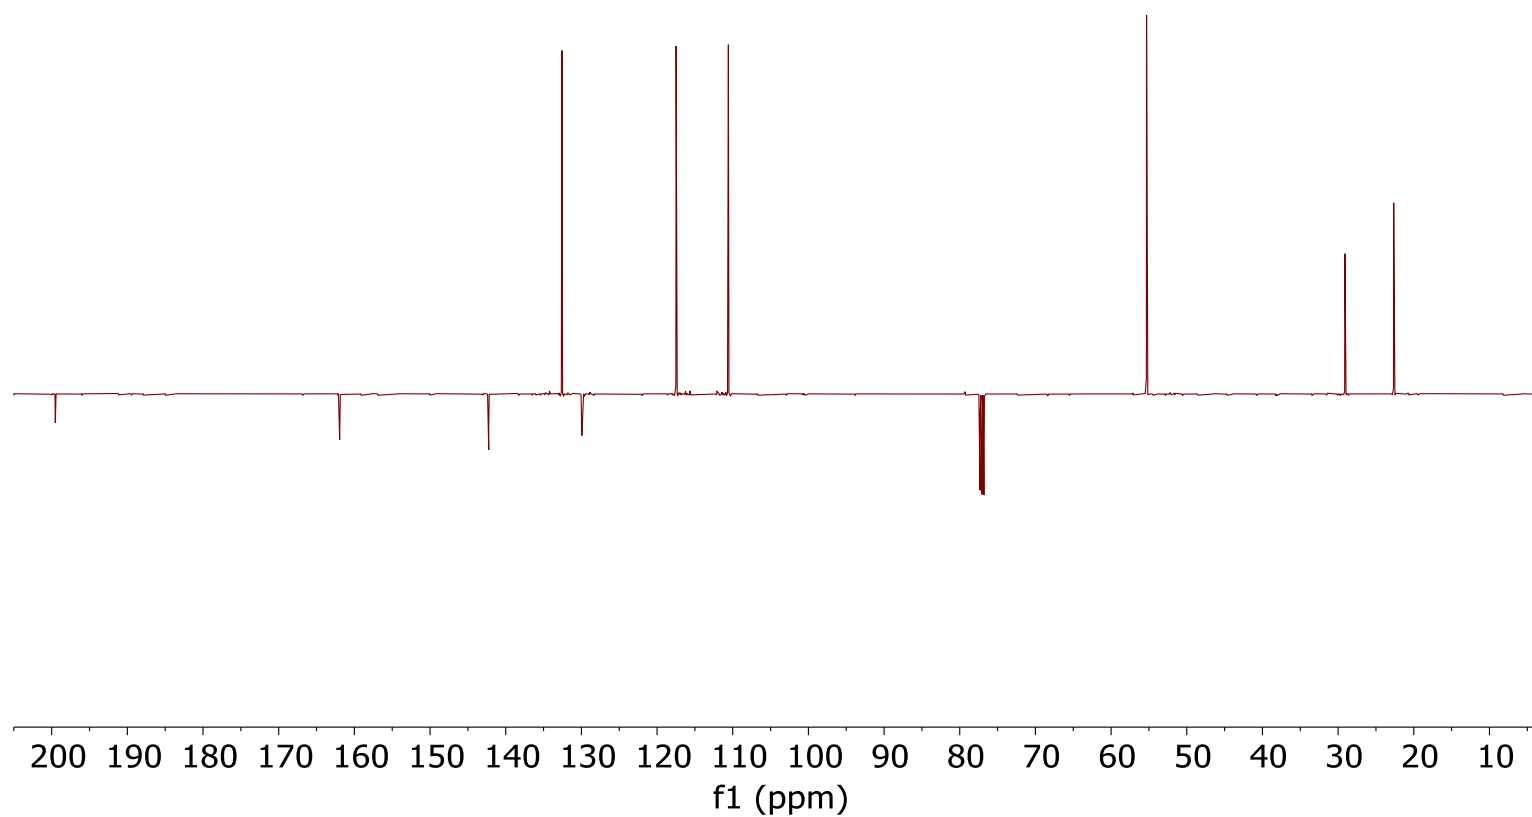

**Figure S12.** <sup>13</sup>C NMR spectrum of 4-methoxy-2-methylacetophenone in CDCl<sub>3</sub>.

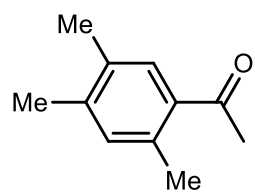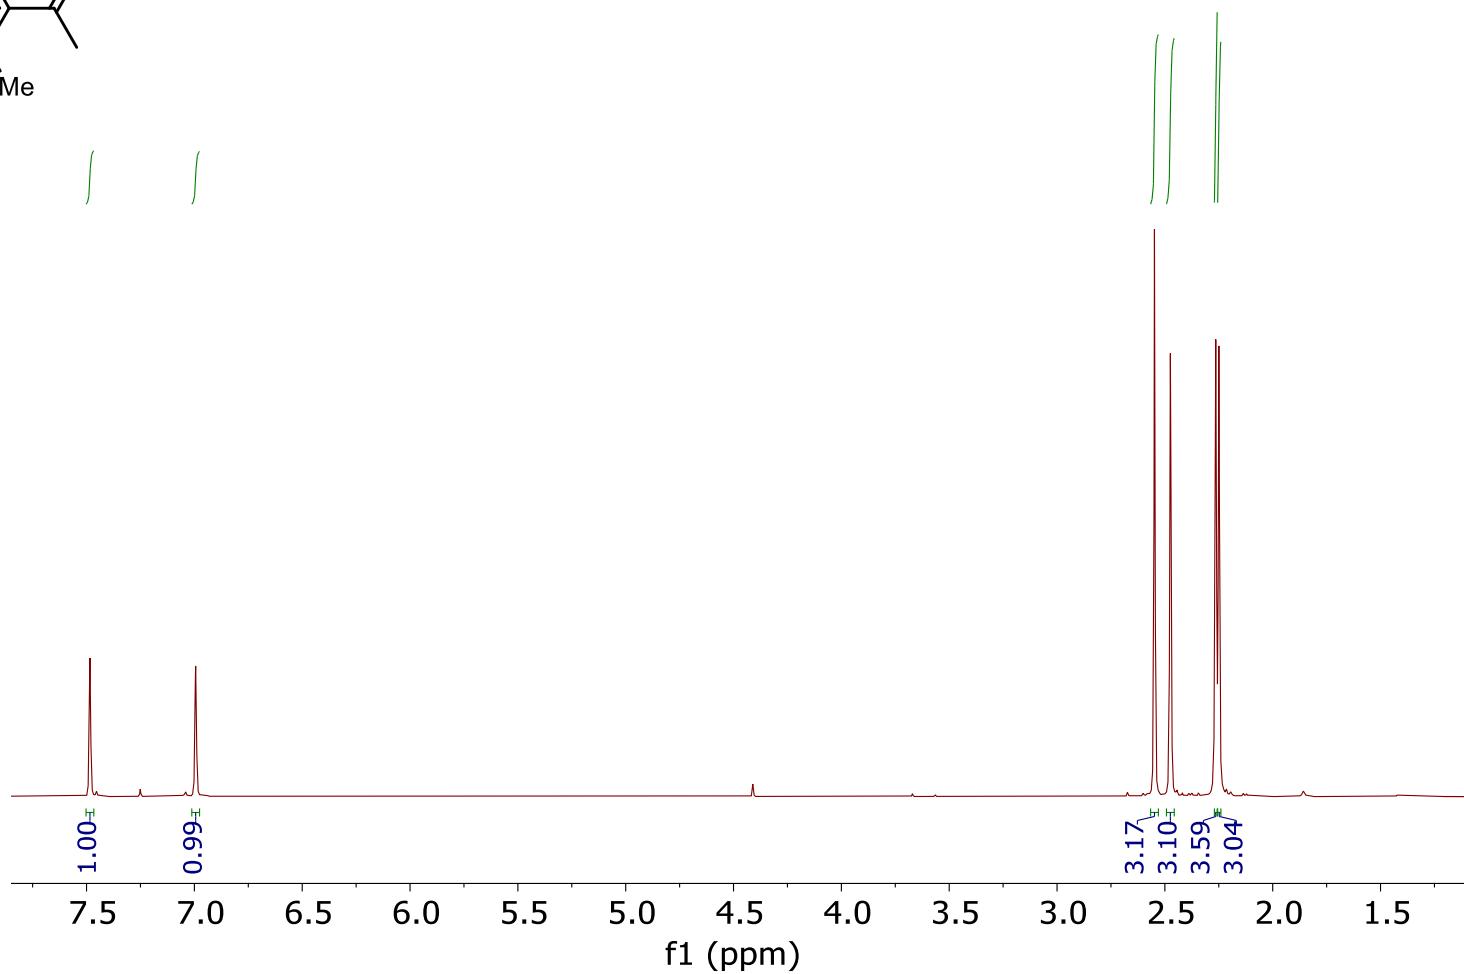

**Figure S13.**  $^1\text{H}$  NMR spectrum of 2,4,5-trimethylacetophenone in  $\text{CDCl}_3$ .

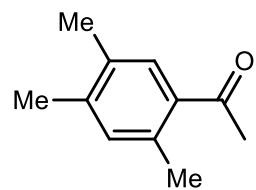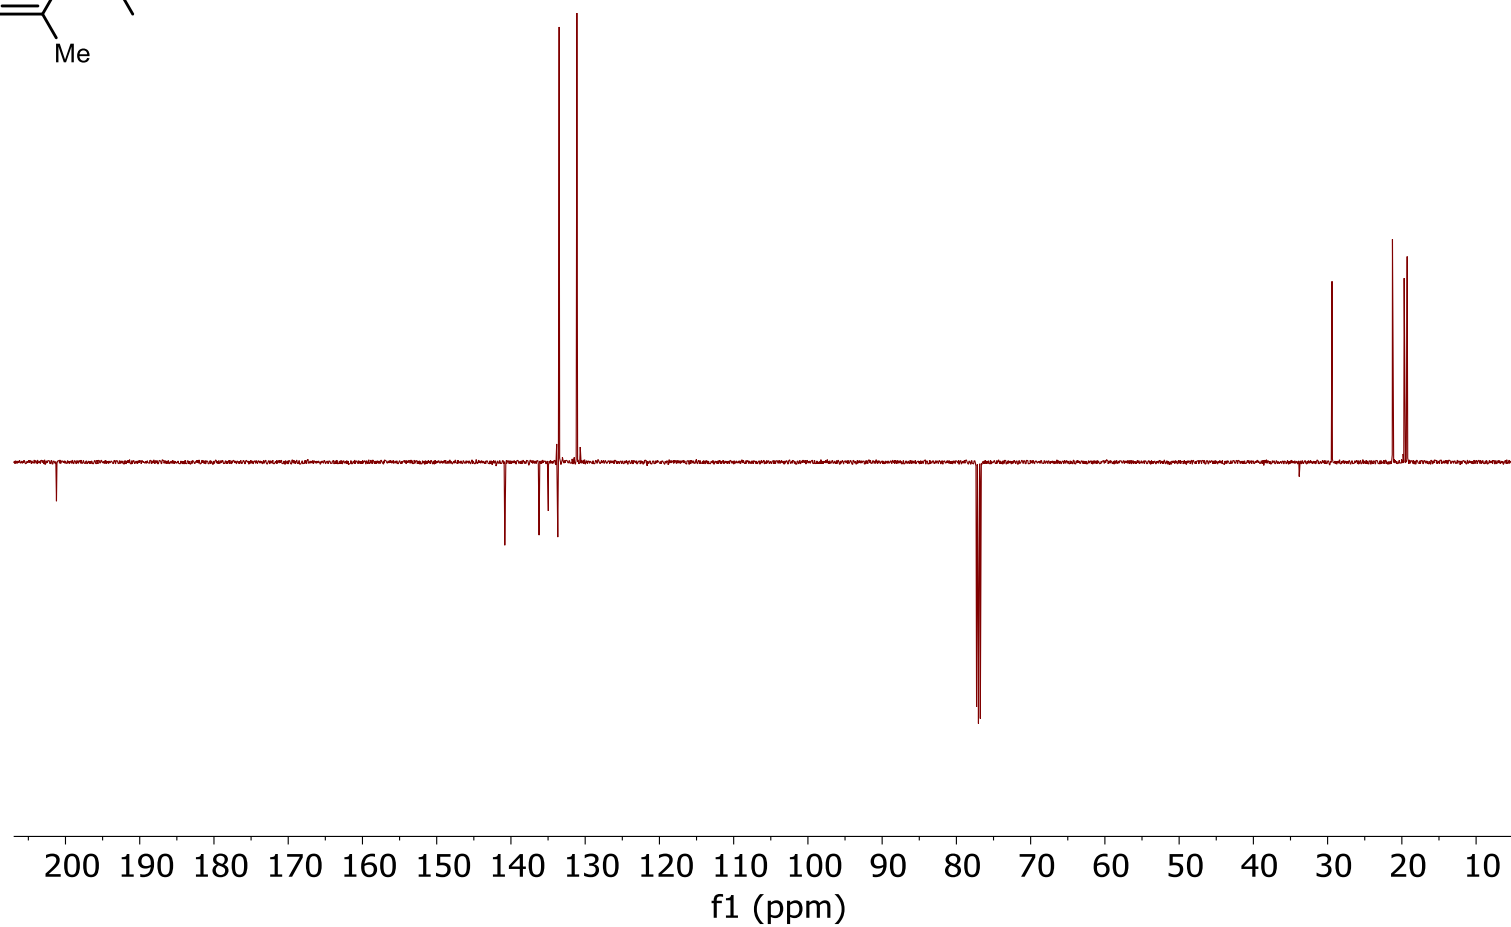

**Figure S14.**  $^{13}\text{C}$  NMR spectrum of 2,4,5-trimethylacetophenone in  $\text{CDCl}_3$ .

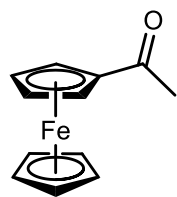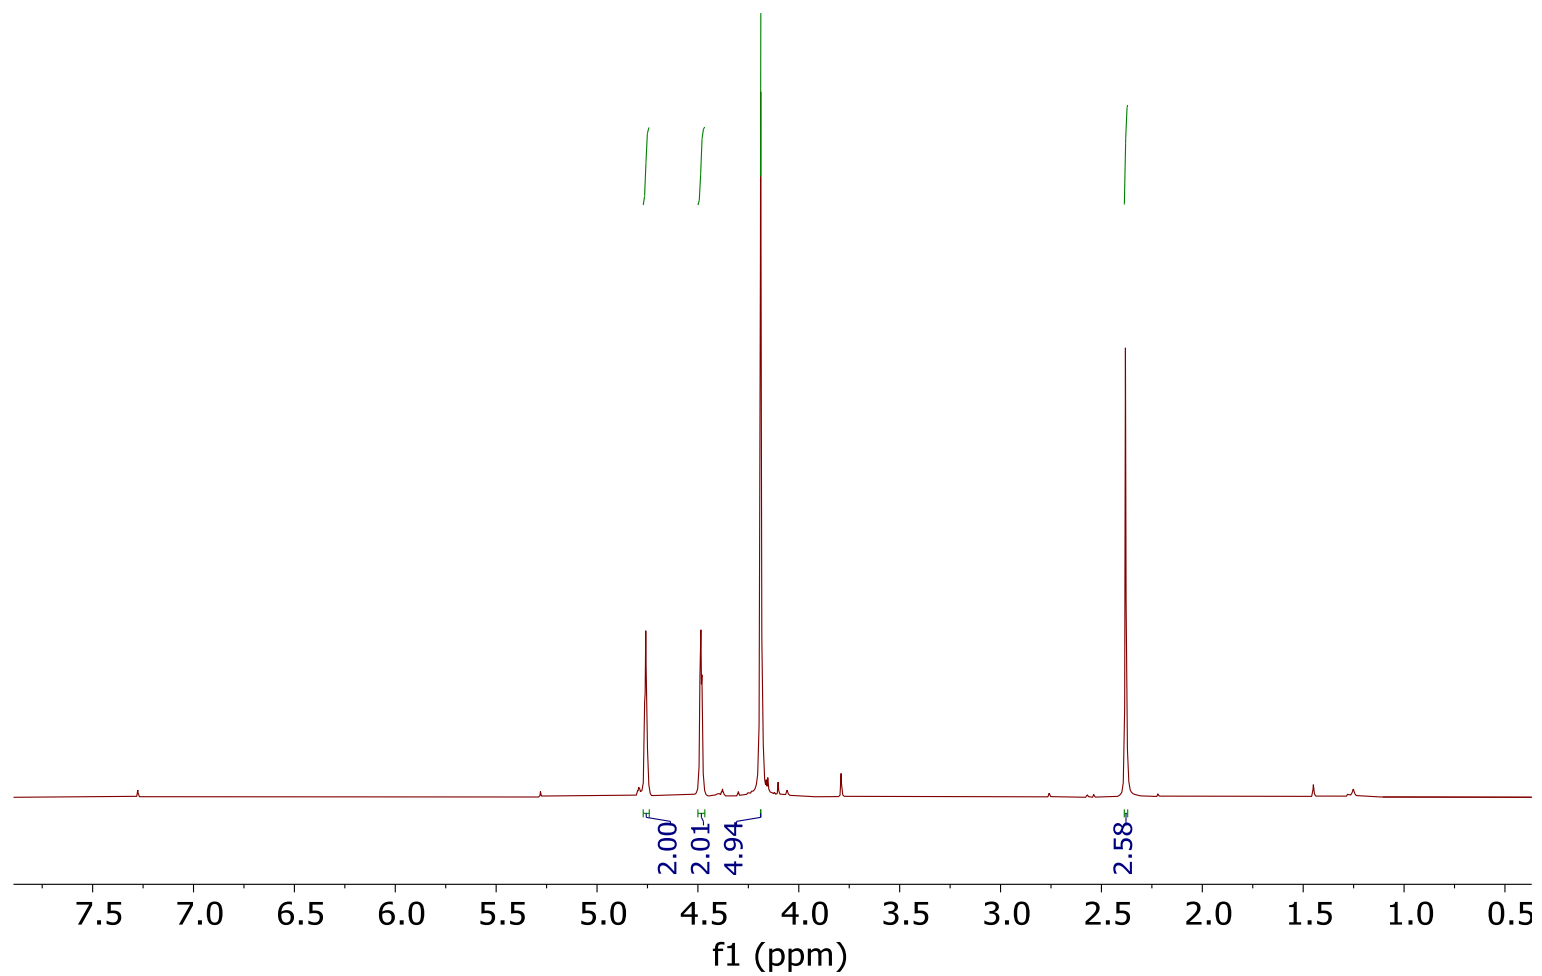

**Figure S15.**  $^1\text{H}$  NMR spectrum of acetylferrocene in  $\text{CDCl}_3$ .

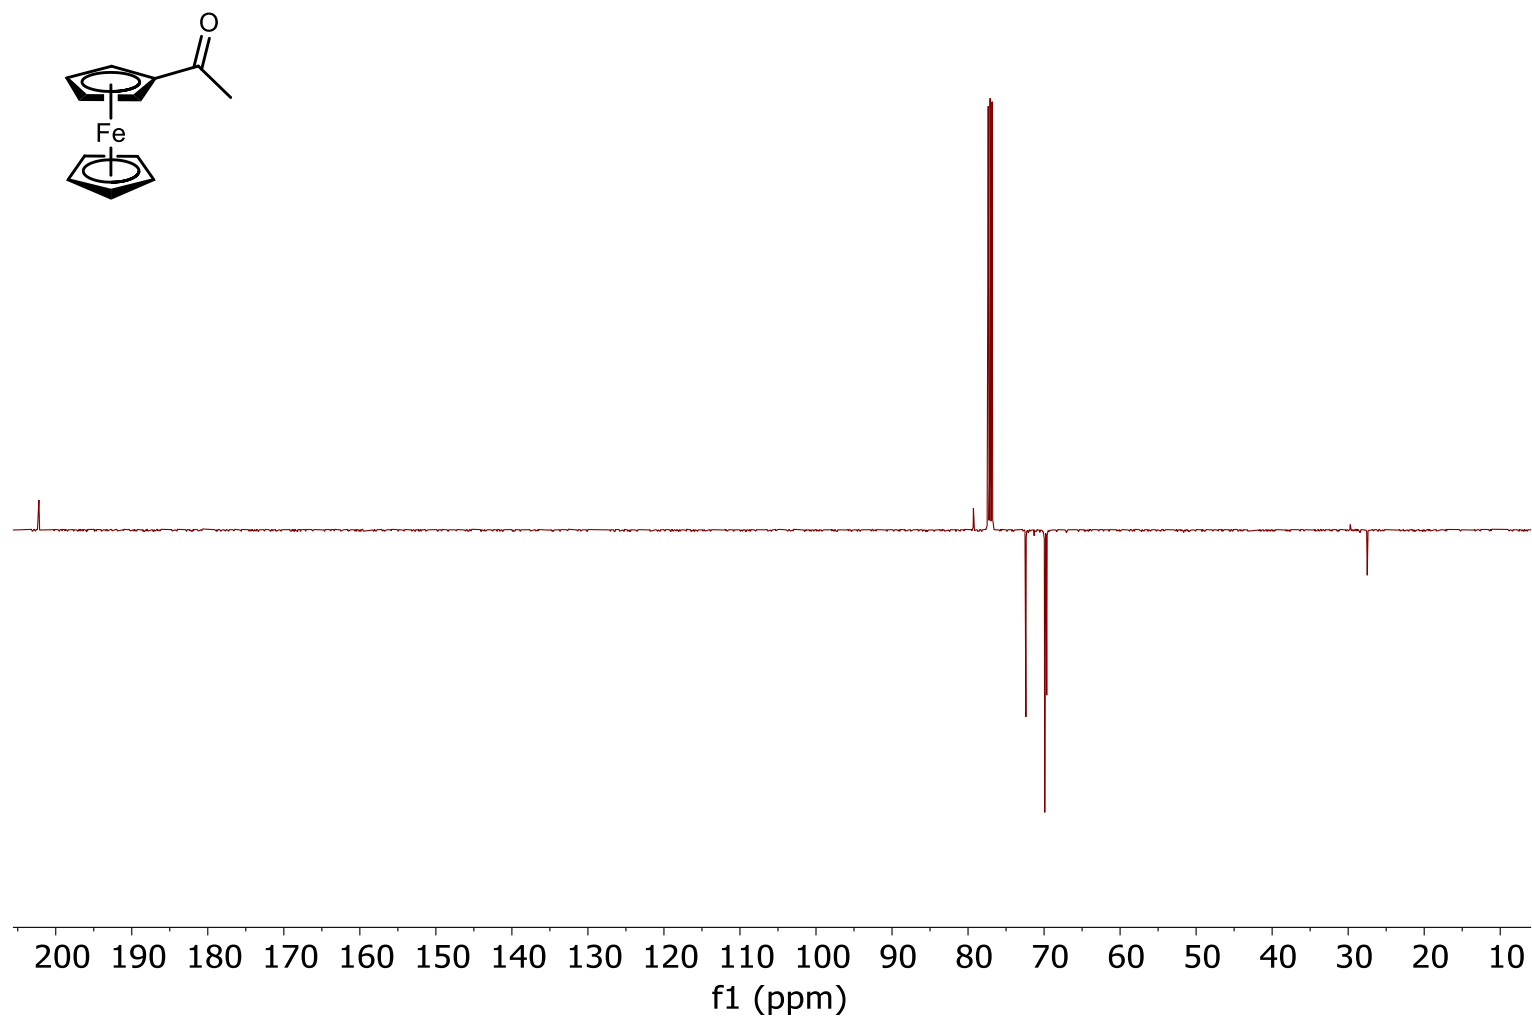

**Figure S16.**  $^{13}\text{C}$  NMR spectrum of acetylferrocene in  $\text{CDCl}_3$ .



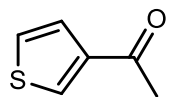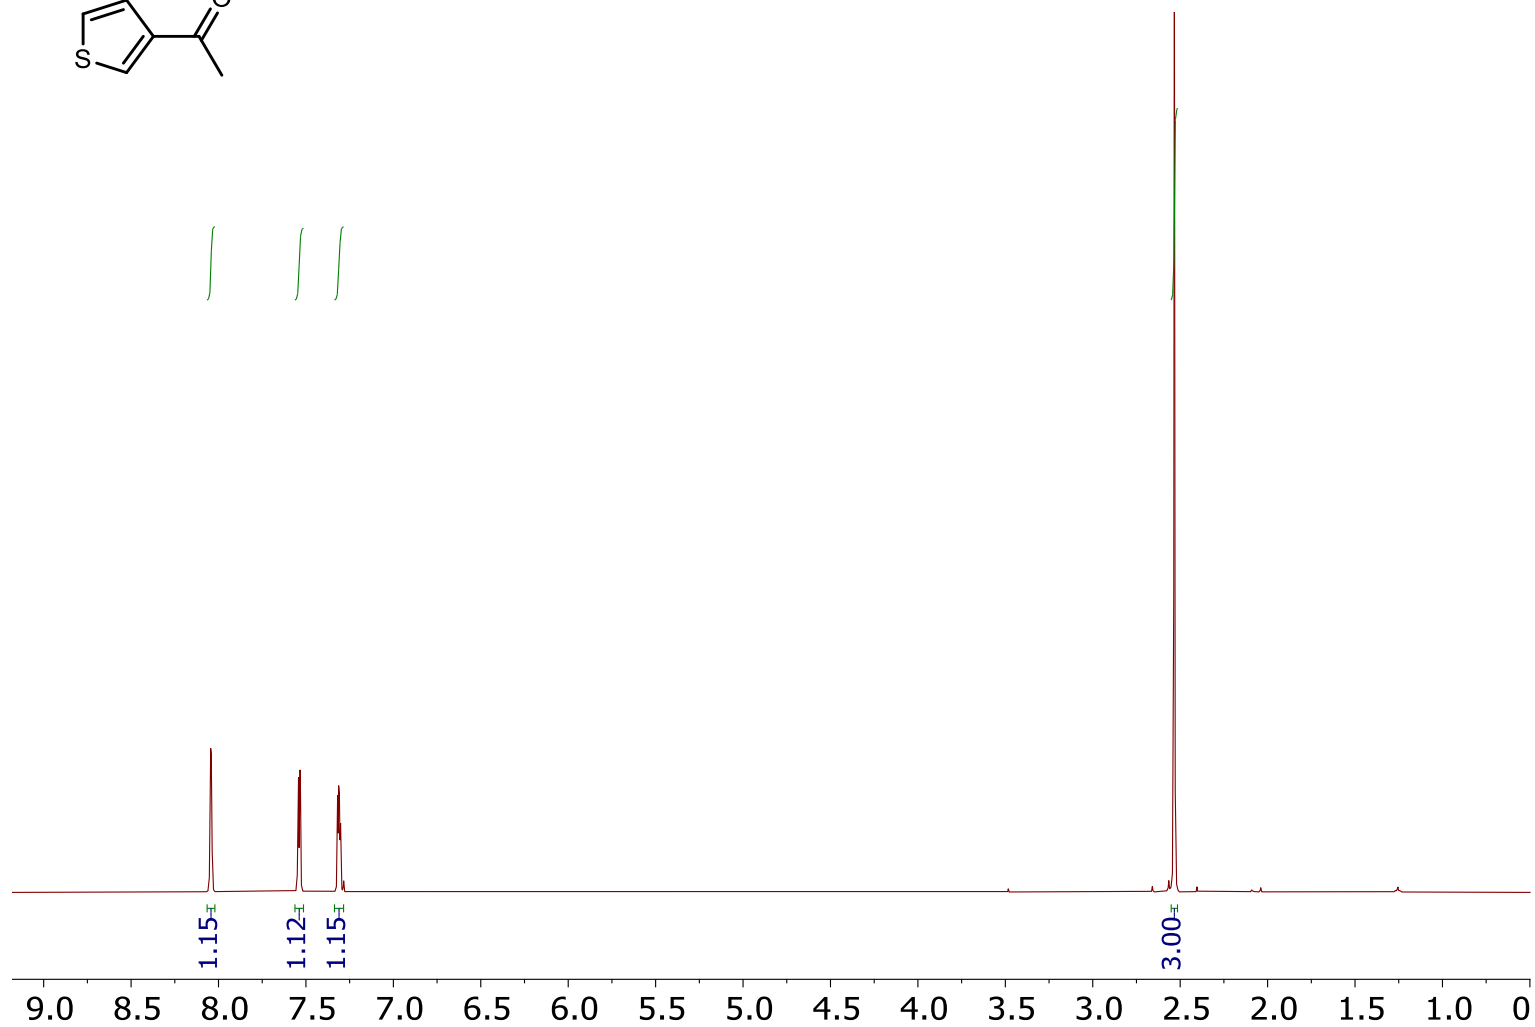

**Figure S17.**  $^1\text{H}$  NMR spectrum of 3-acetylthiophene in  $\text{CDCl}_3$ .

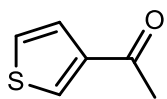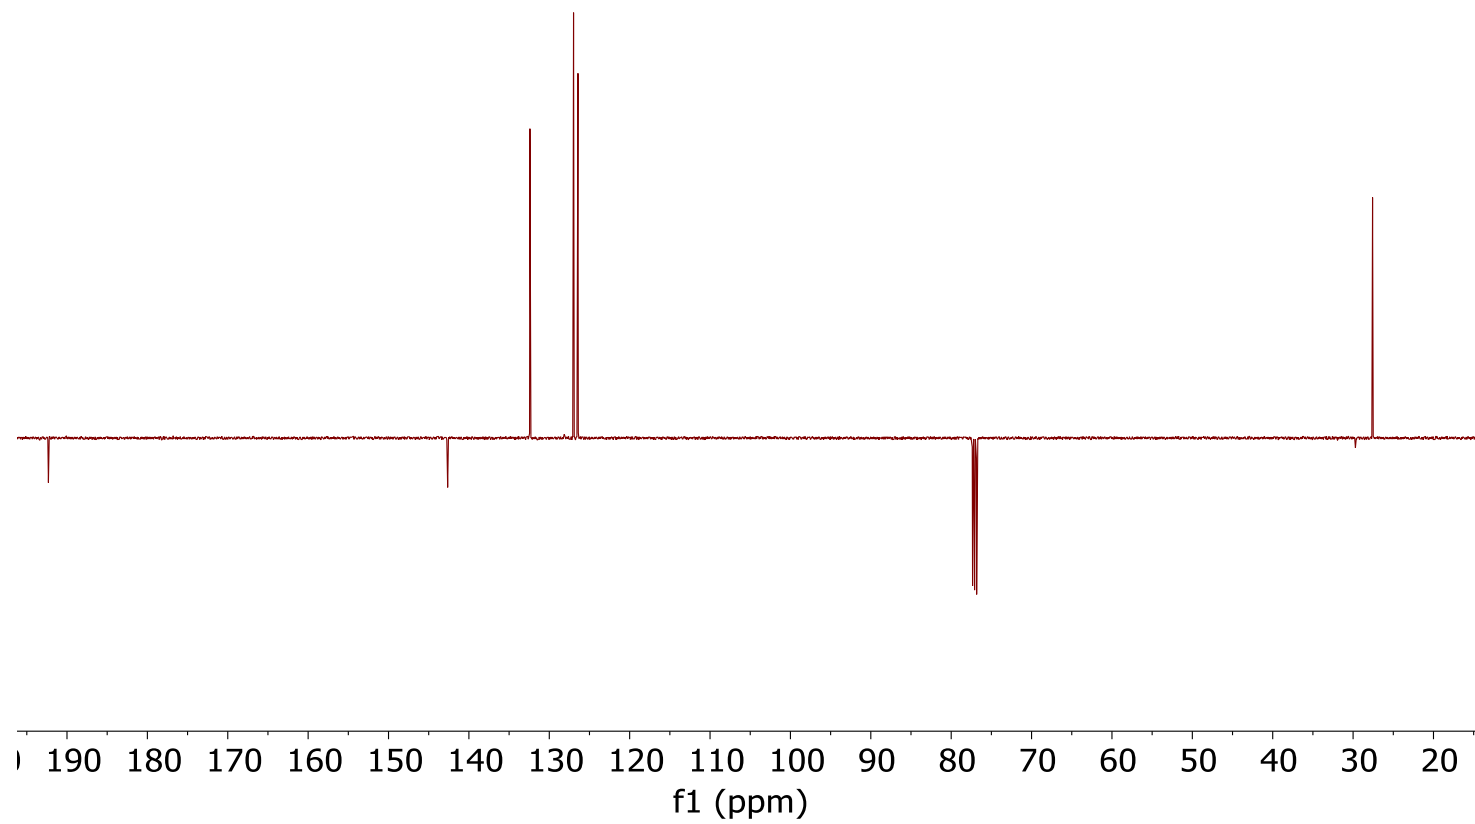

**Figure S18.**  $^{13}\text{C}$  NMR spectrum of 3-acetylthiophene in  $\text{CDCl}_3$ .

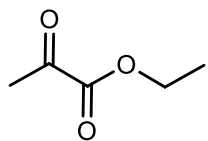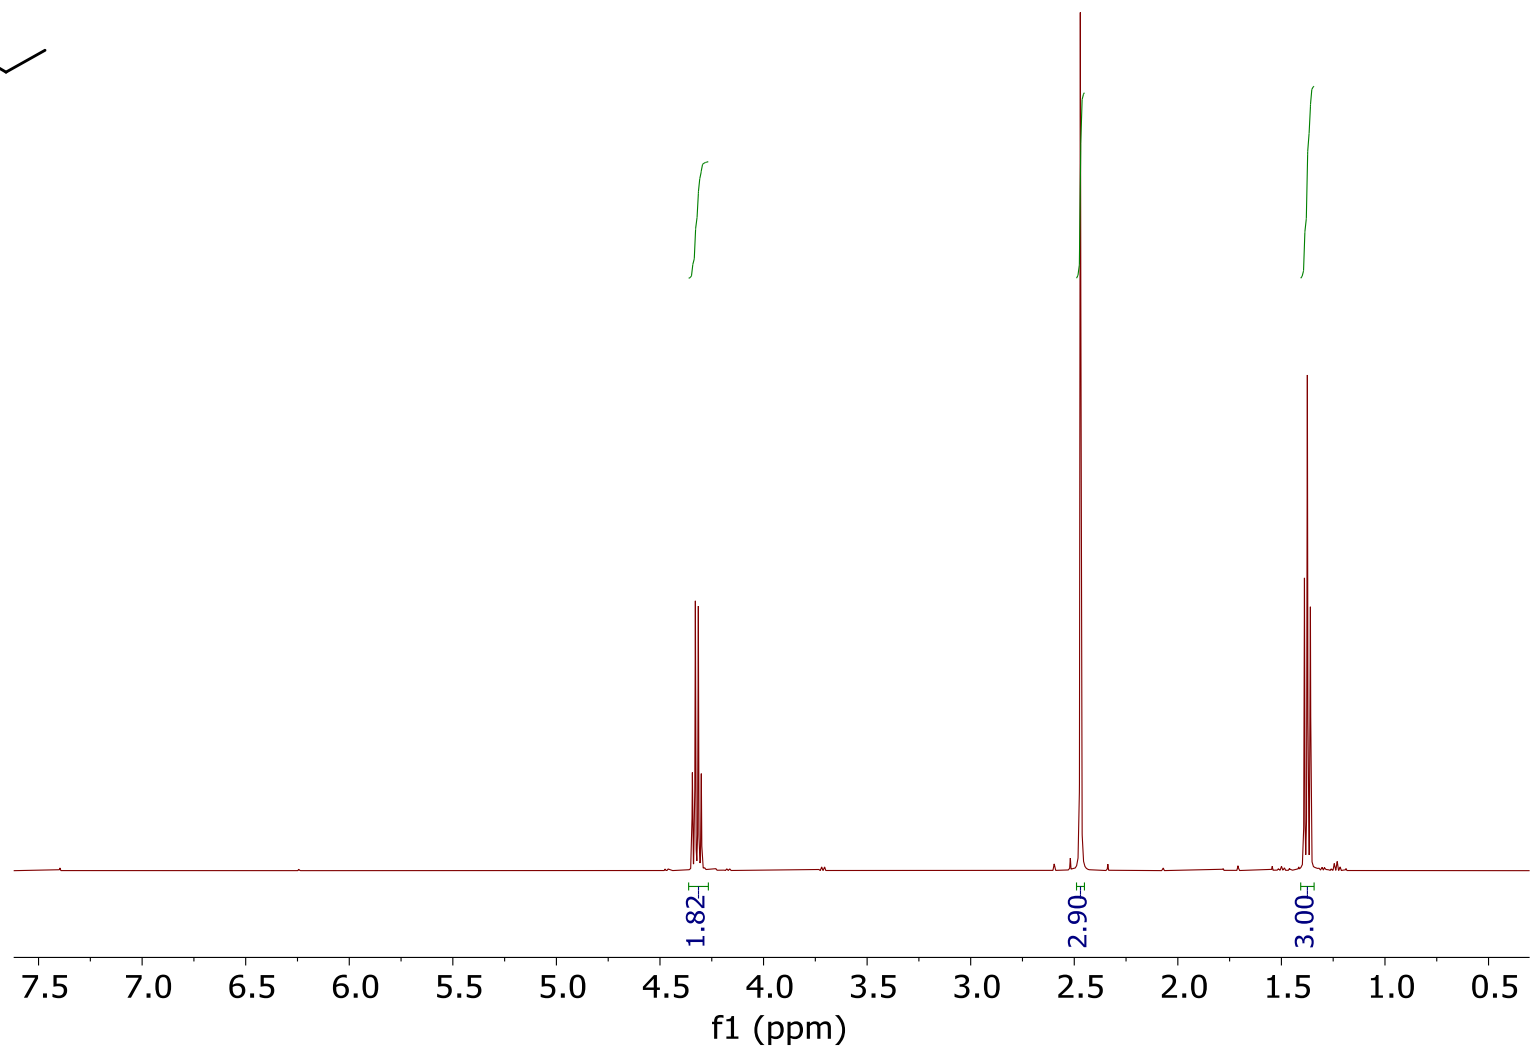

**Figure S19.**  $^1\text{H}$  NMR spectrum of ethyl-pyruvate in  $\text{CDCl}_3$ .

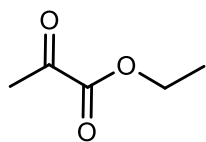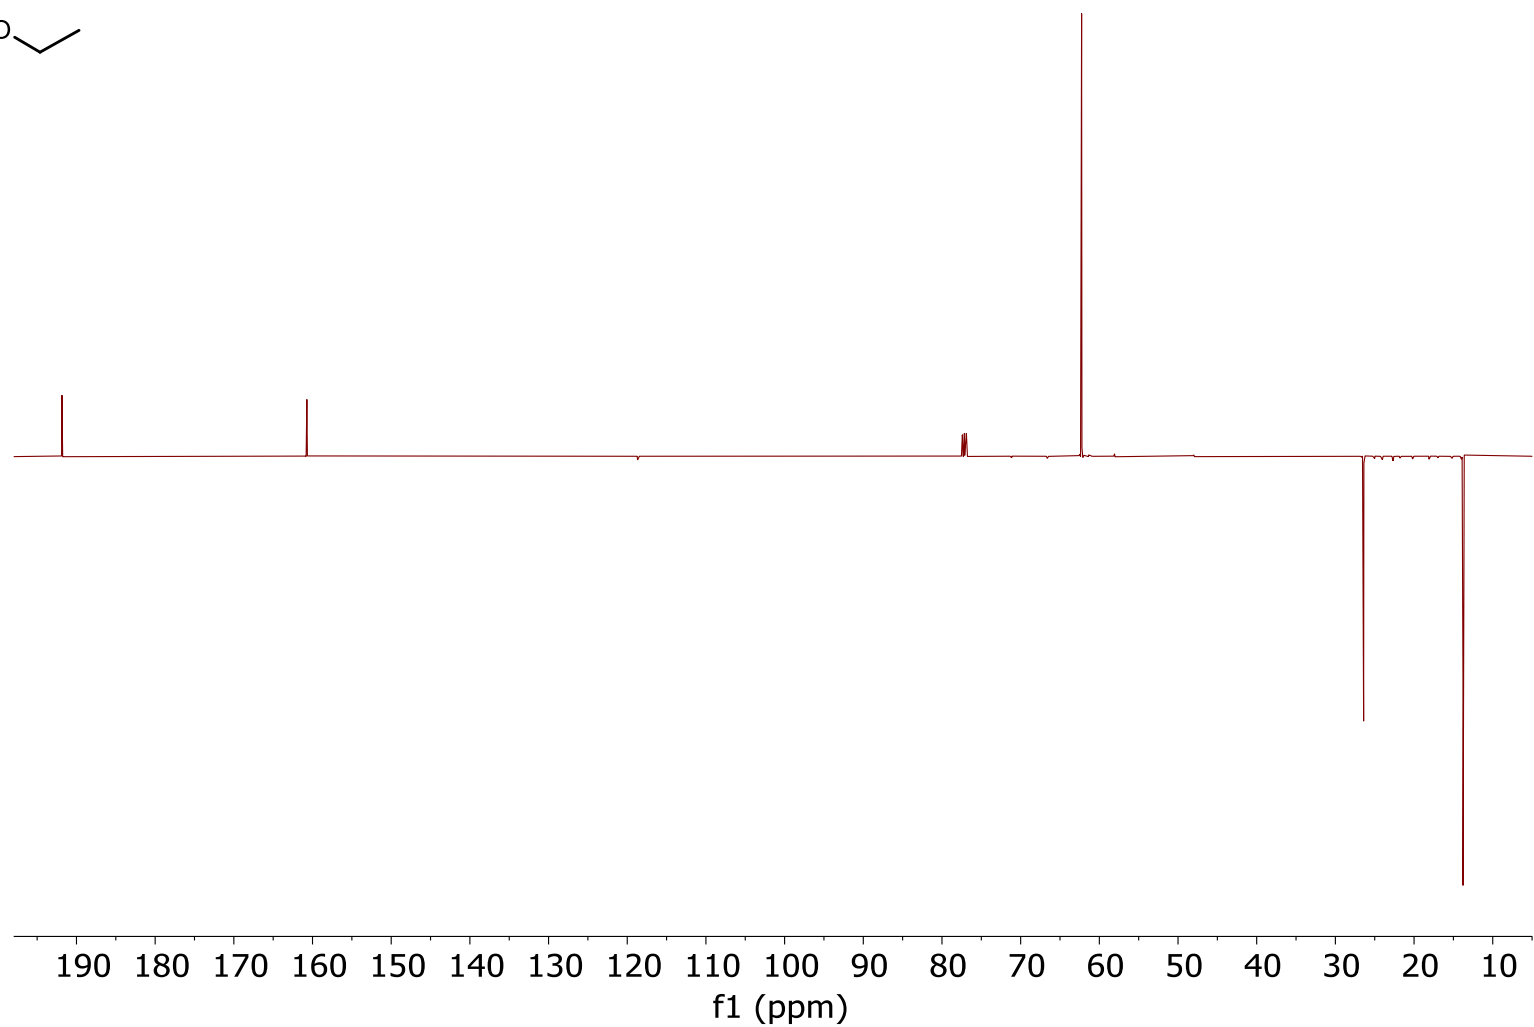

**Figure S20.**  $^{13}\text{C}$  NMR spectrum of ethyl-pyruvate in  $\text{CDCl}_3$ .

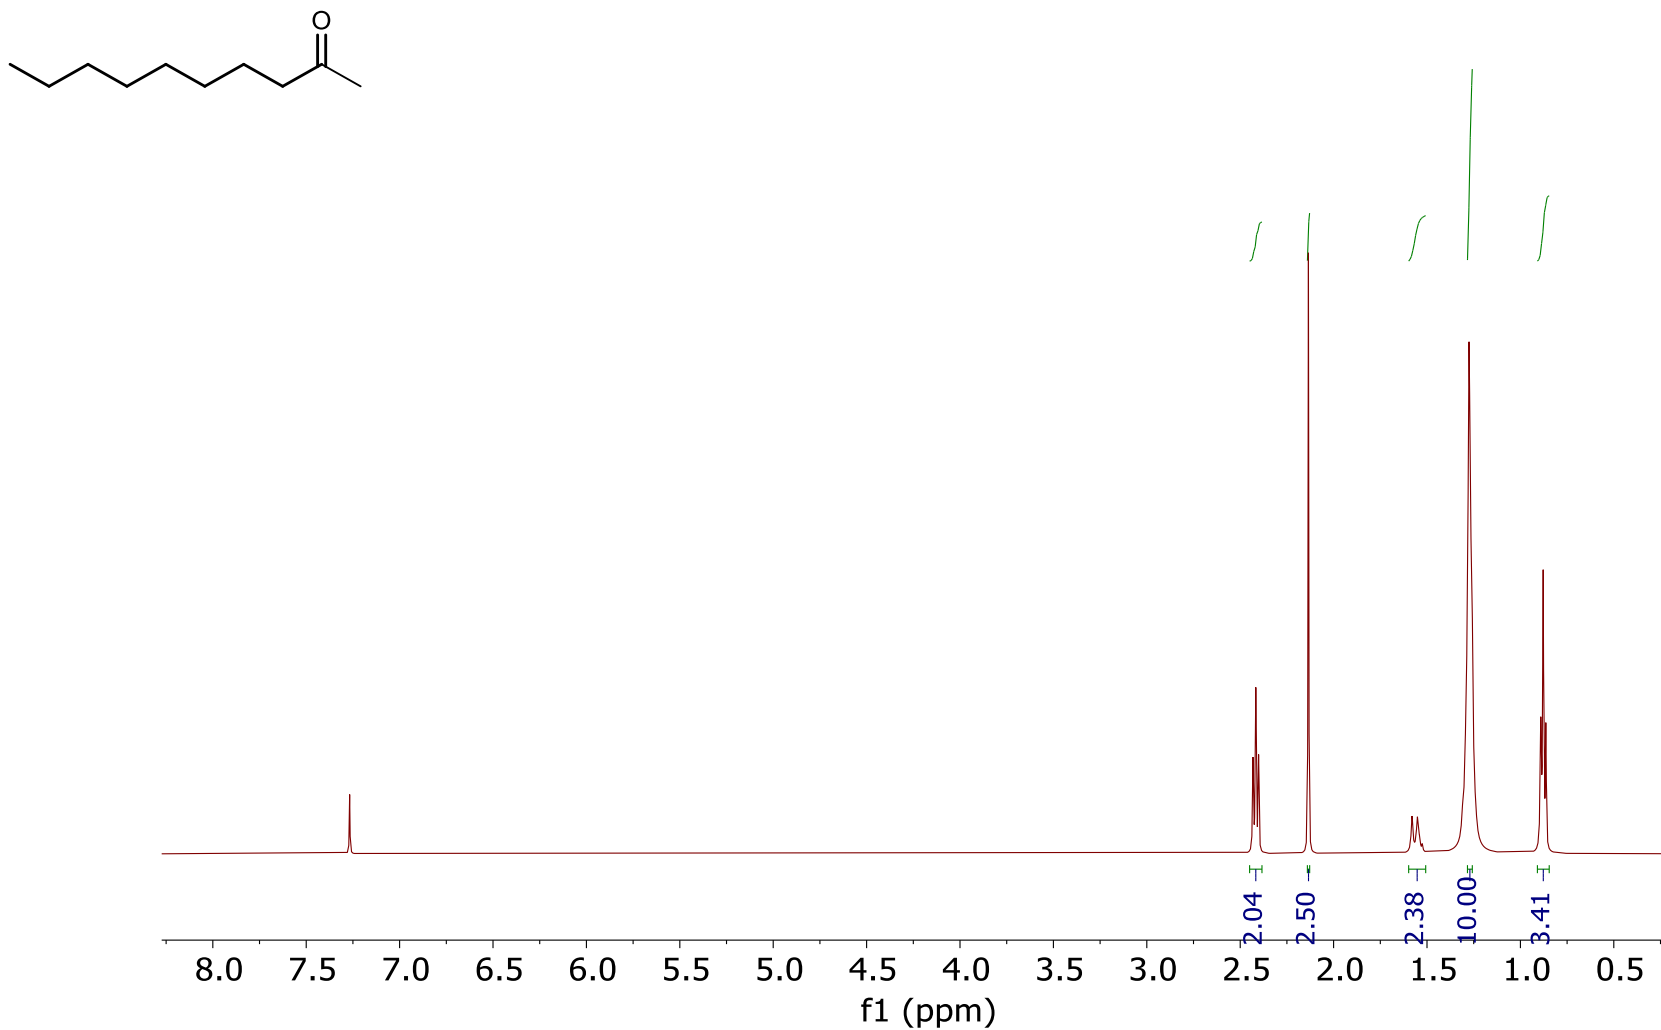

**Figure S21.** <sup>1</sup>H NMR spectrum of 2-decanone in CDCl<sub>3</sub>.

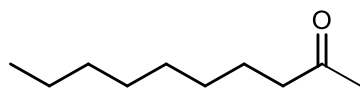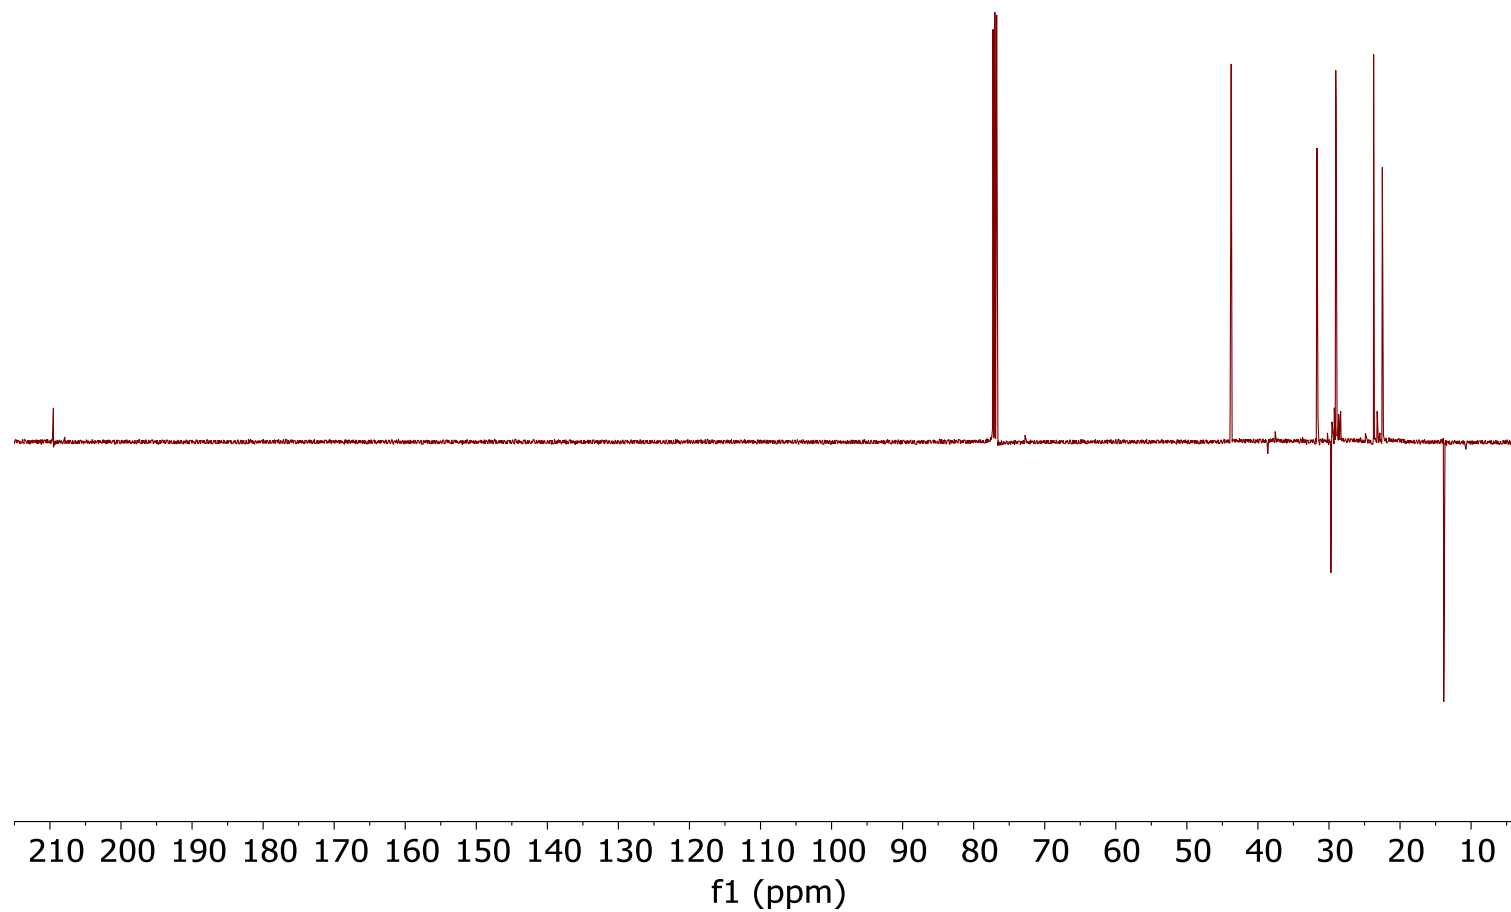

**Figure S22.**  $^{13}\text{C}$  NMR spectrum of 2-decanone in  $\text{CDCl}_3$ .

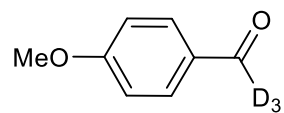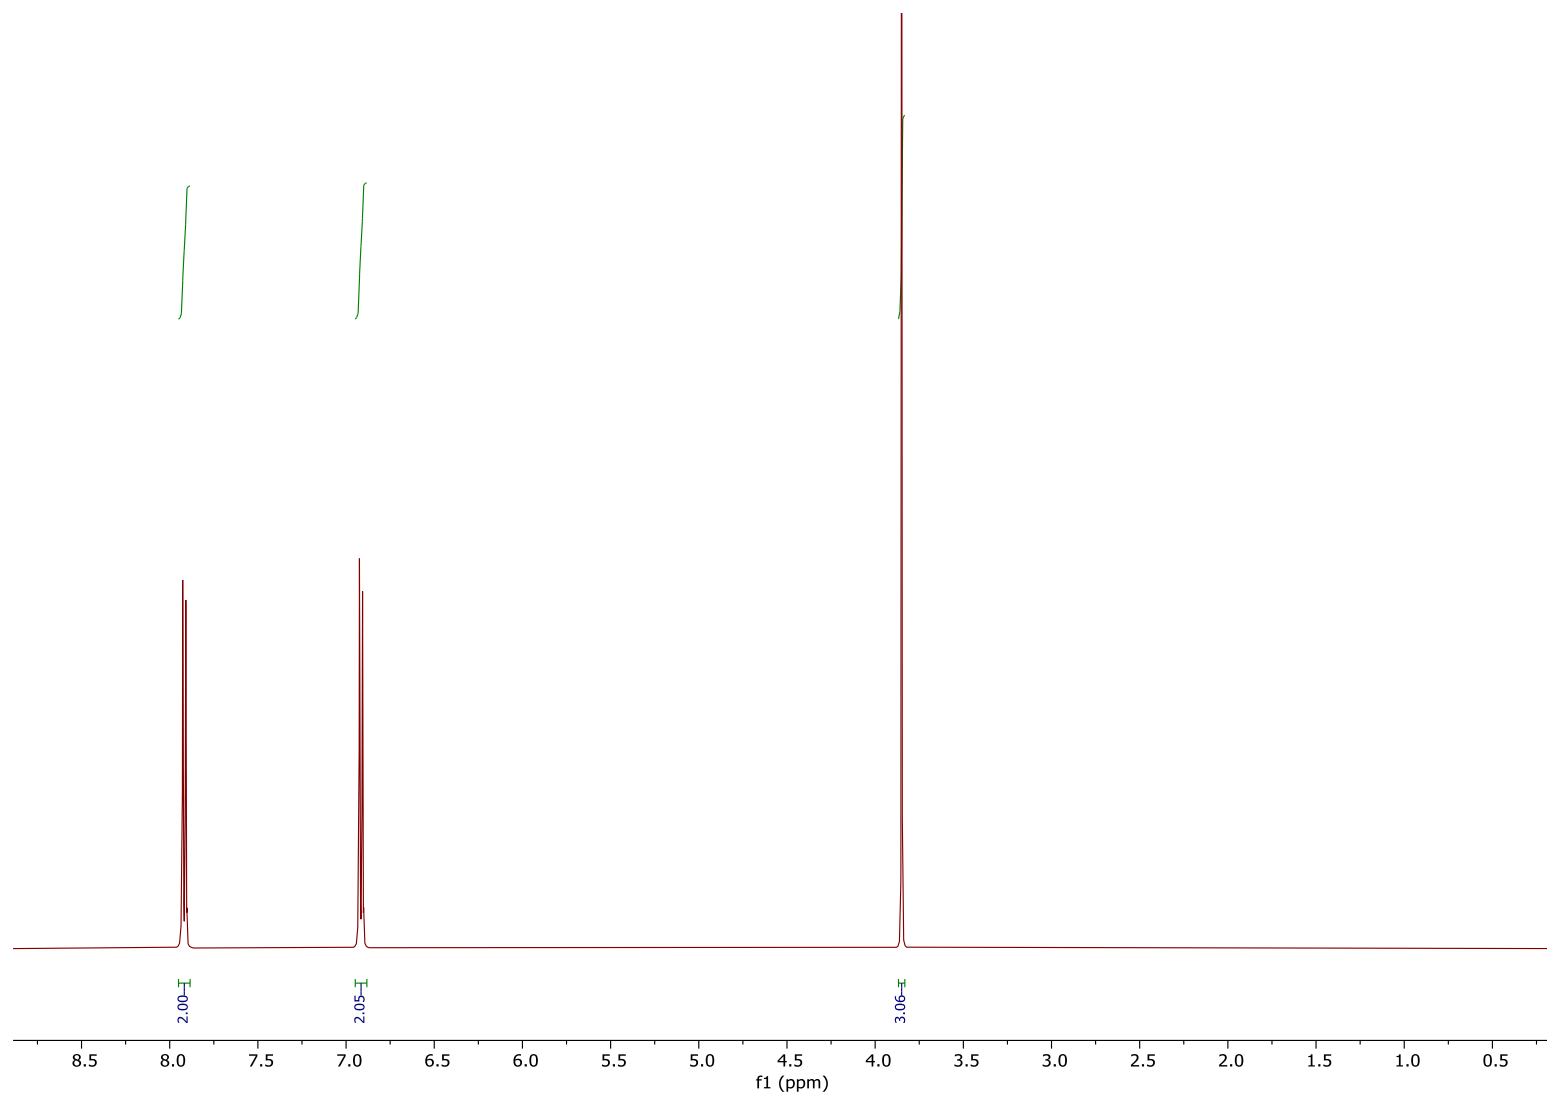

**Figure S23.**  $^1\text{H}$  NMR spectrum of 1-(4-methoxyphenyl)ethan-1-one-2,2,2- $d_3$

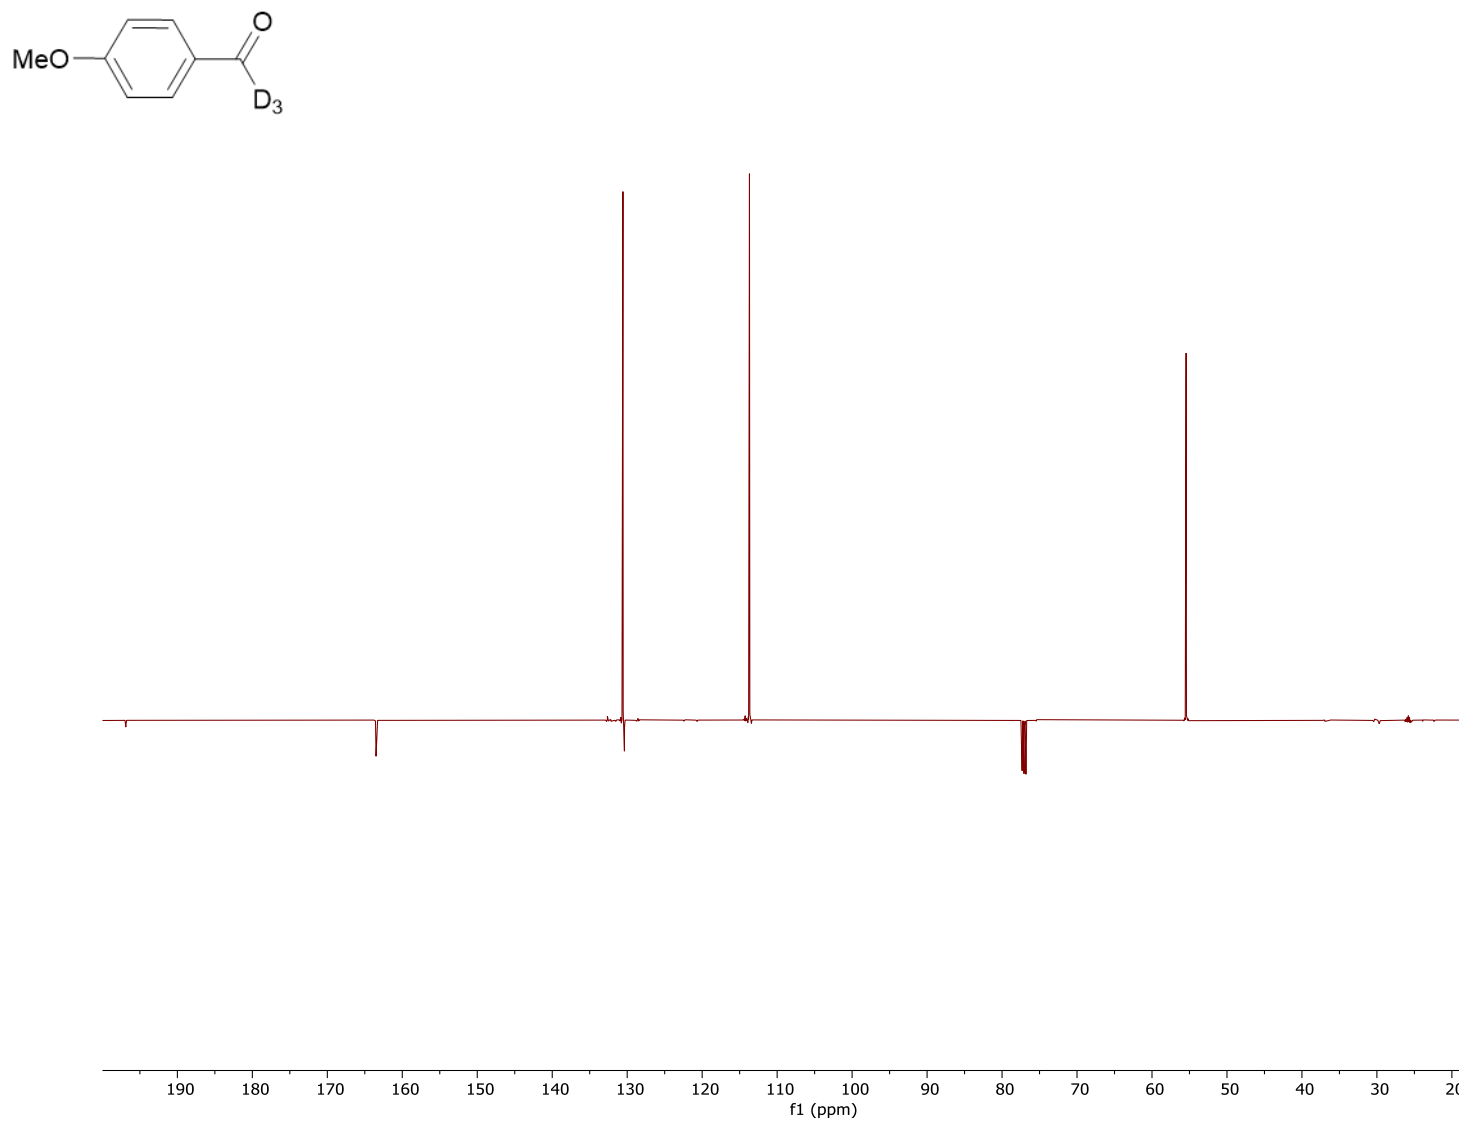

**Figure S24.**  $^{13}\text{C}$  NMR spectrum of 1-(4-methoxyphenyl)ethan-1-one-2,2,2- $d_3$



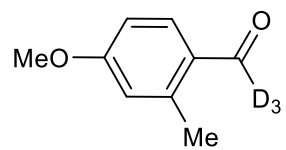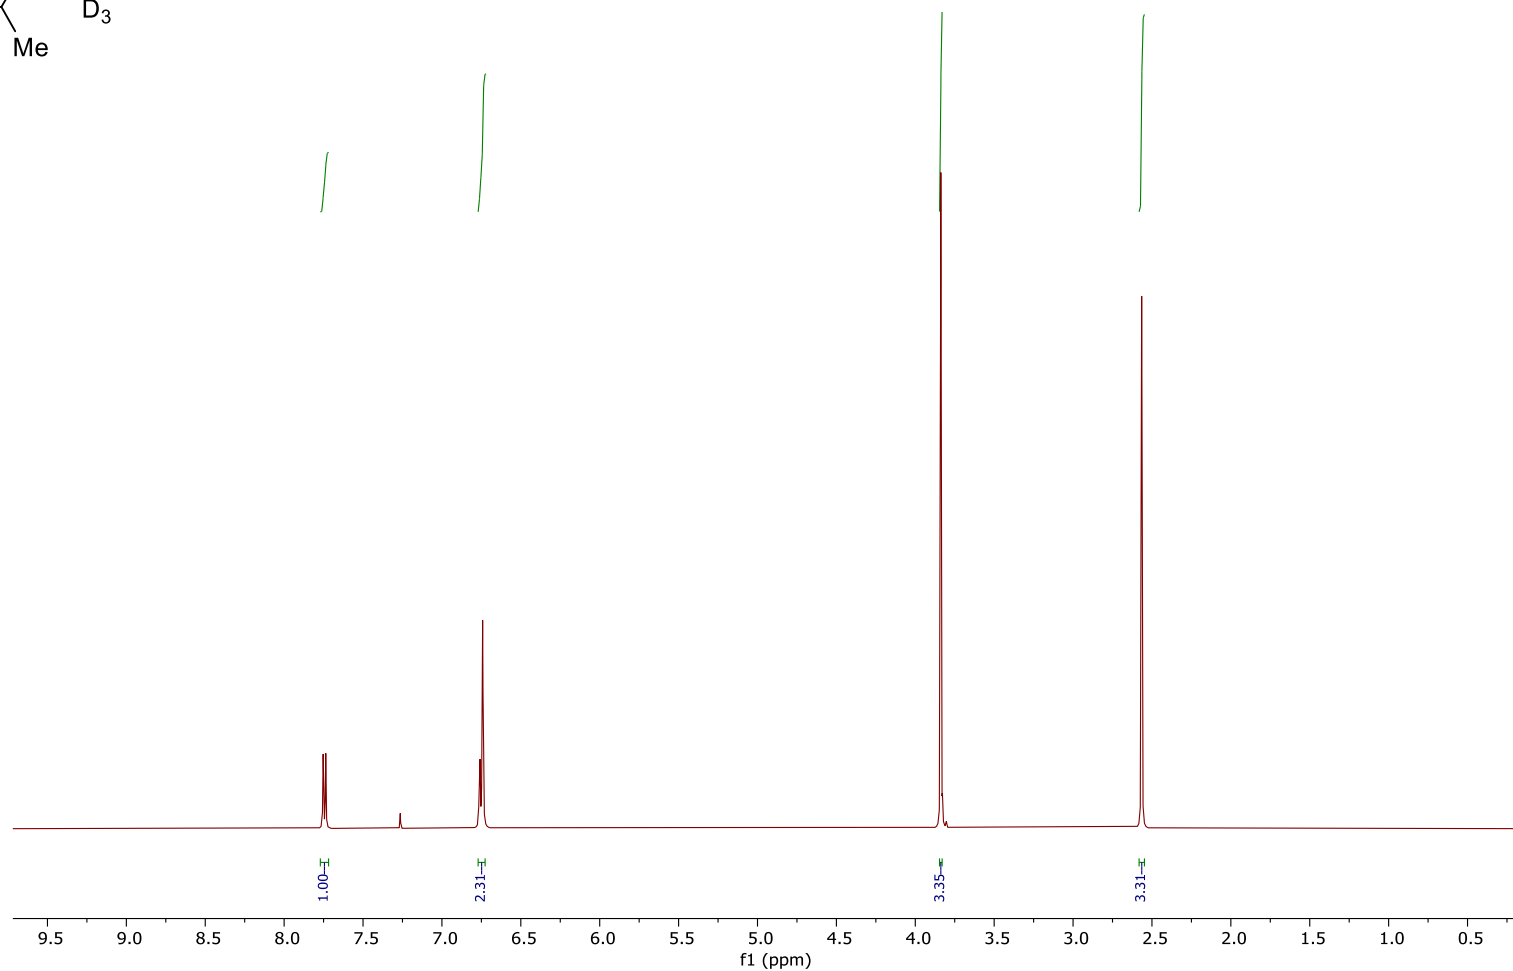

**Figure S25.**  $^1\text{H}$  NMR spectrum of 1-(4-methoxy-2-methylphenyl)ethan-1-one-2,2,2-d<sub>3</sub>

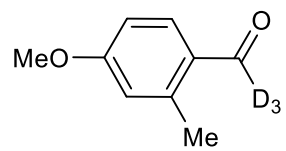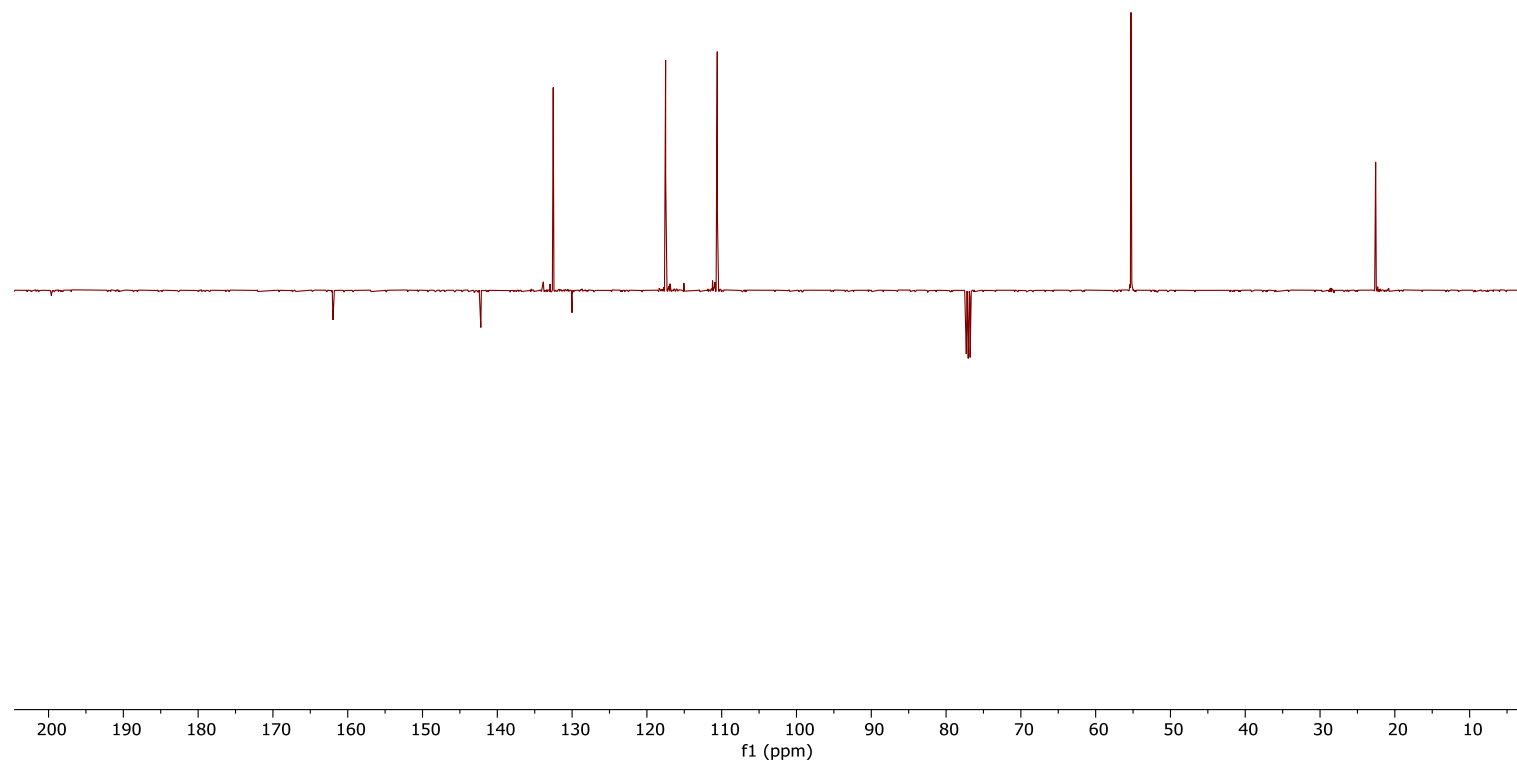

**Figure S26.**  $^{13}\text{C}$  NMR spectrum of 1-(4-methoxy-2-methylphenyl)ethan-1-one-2,2,2-d<sub>3</sub>

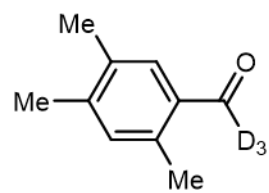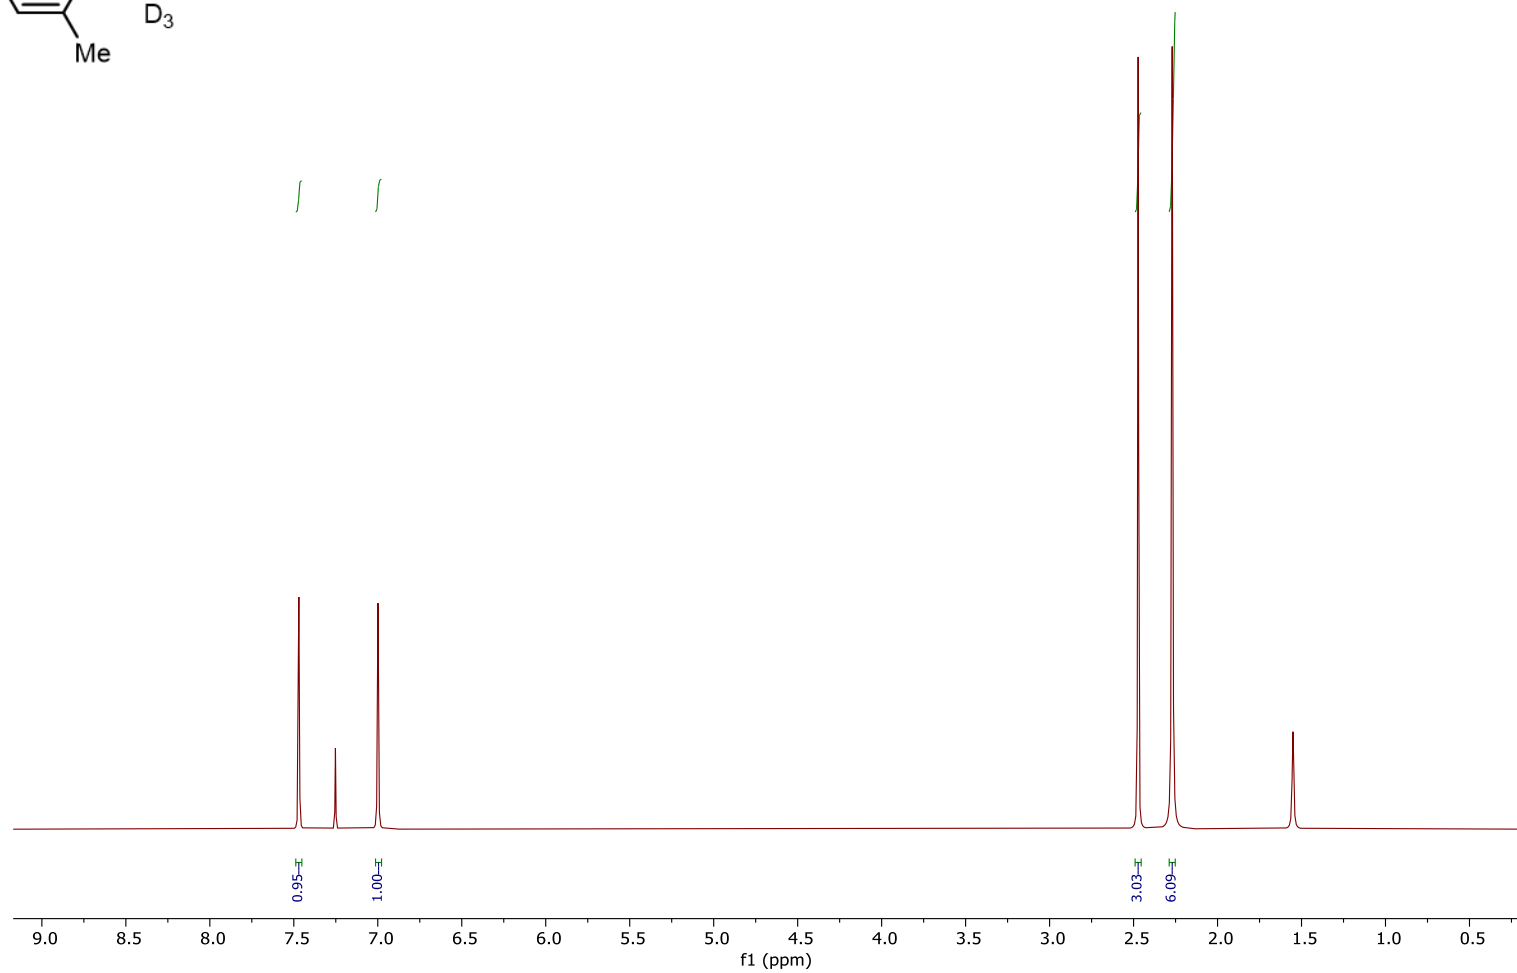

**Figure S27.**  $^1\text{H}$  NMR spectrum of 1-(2,4,5-trimethylphenyl)ethan-1-one-2,2,2-d<sub>3</sub>

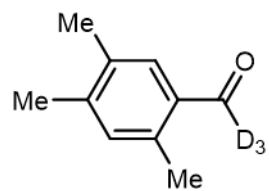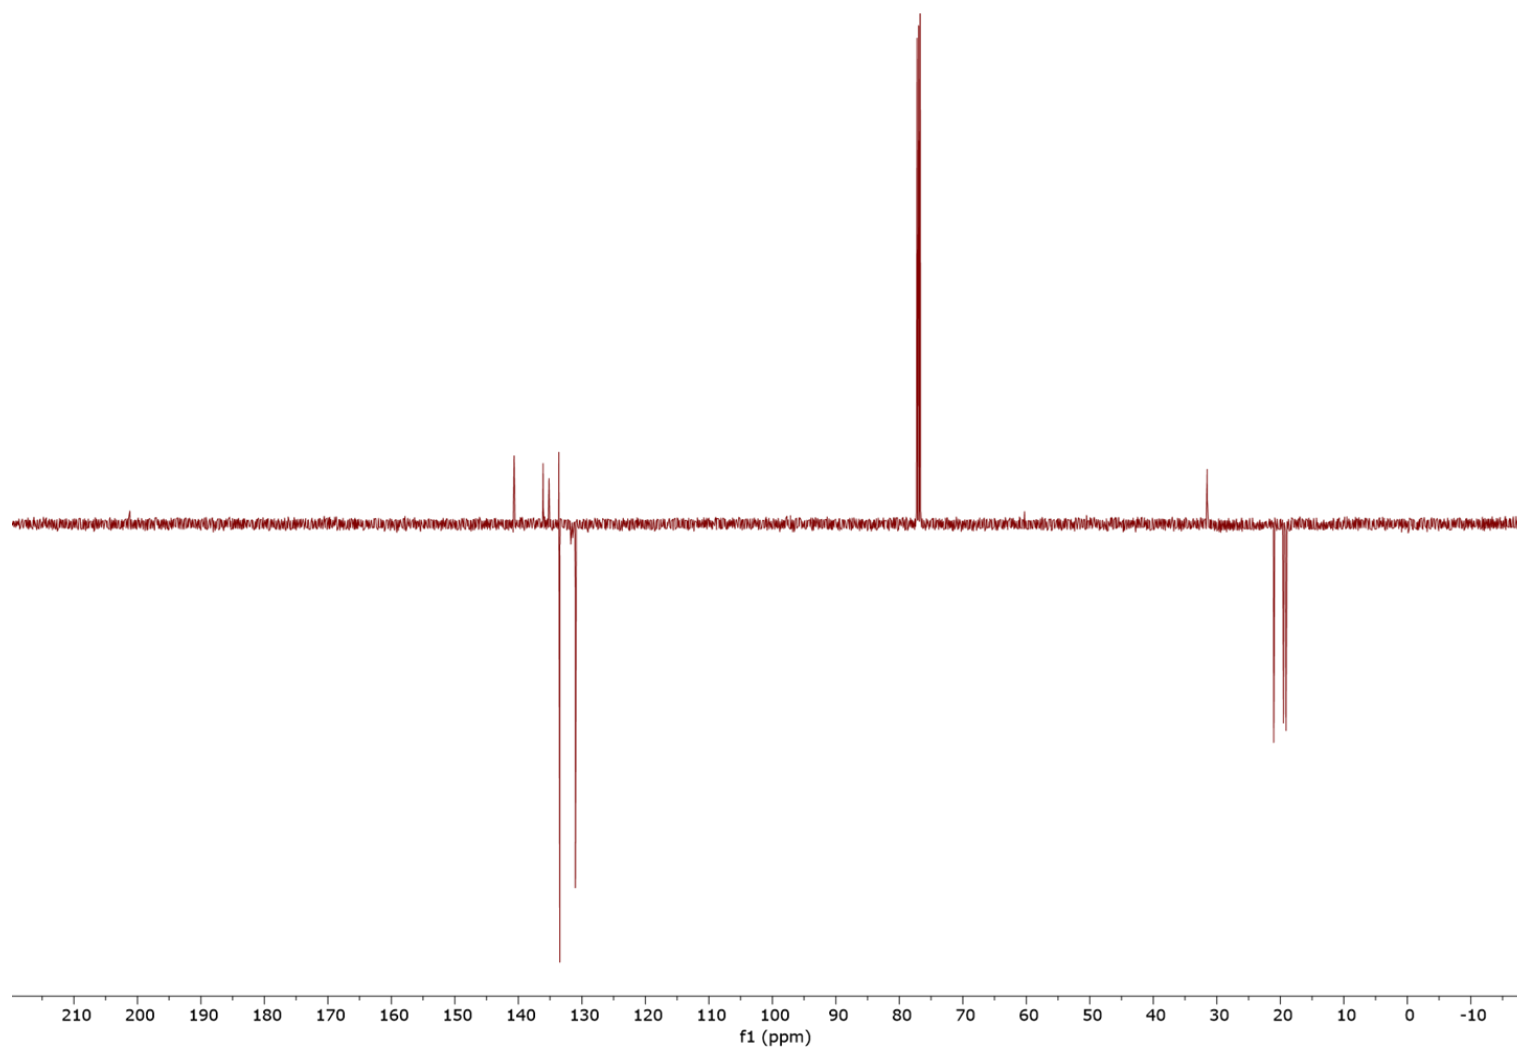

**Figure S28.**  $^{13}\text{C}$  NMR spectrum of 1-(2,4,5-trimethylphenyl)ethan-1-one-2,2,2-d<sub>3</sub>

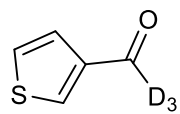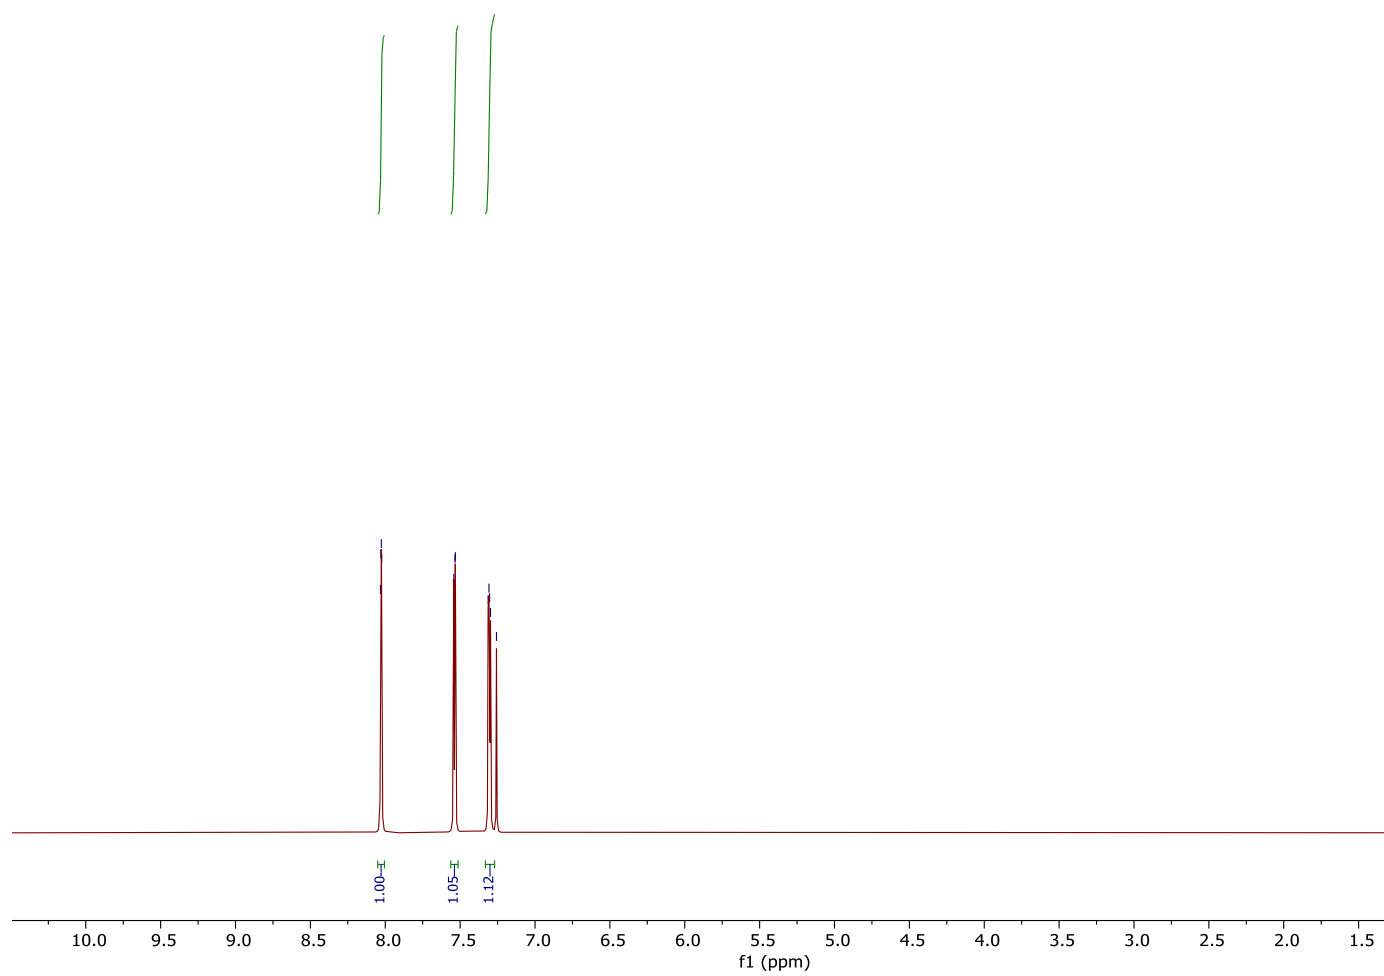

**Figure S29.**  $^1\text{H}$  NMR spectrum of 1-(thiophen-3-yl)ethan-1-one-2,2,2-d<sub>3</sub>

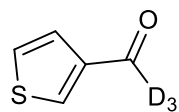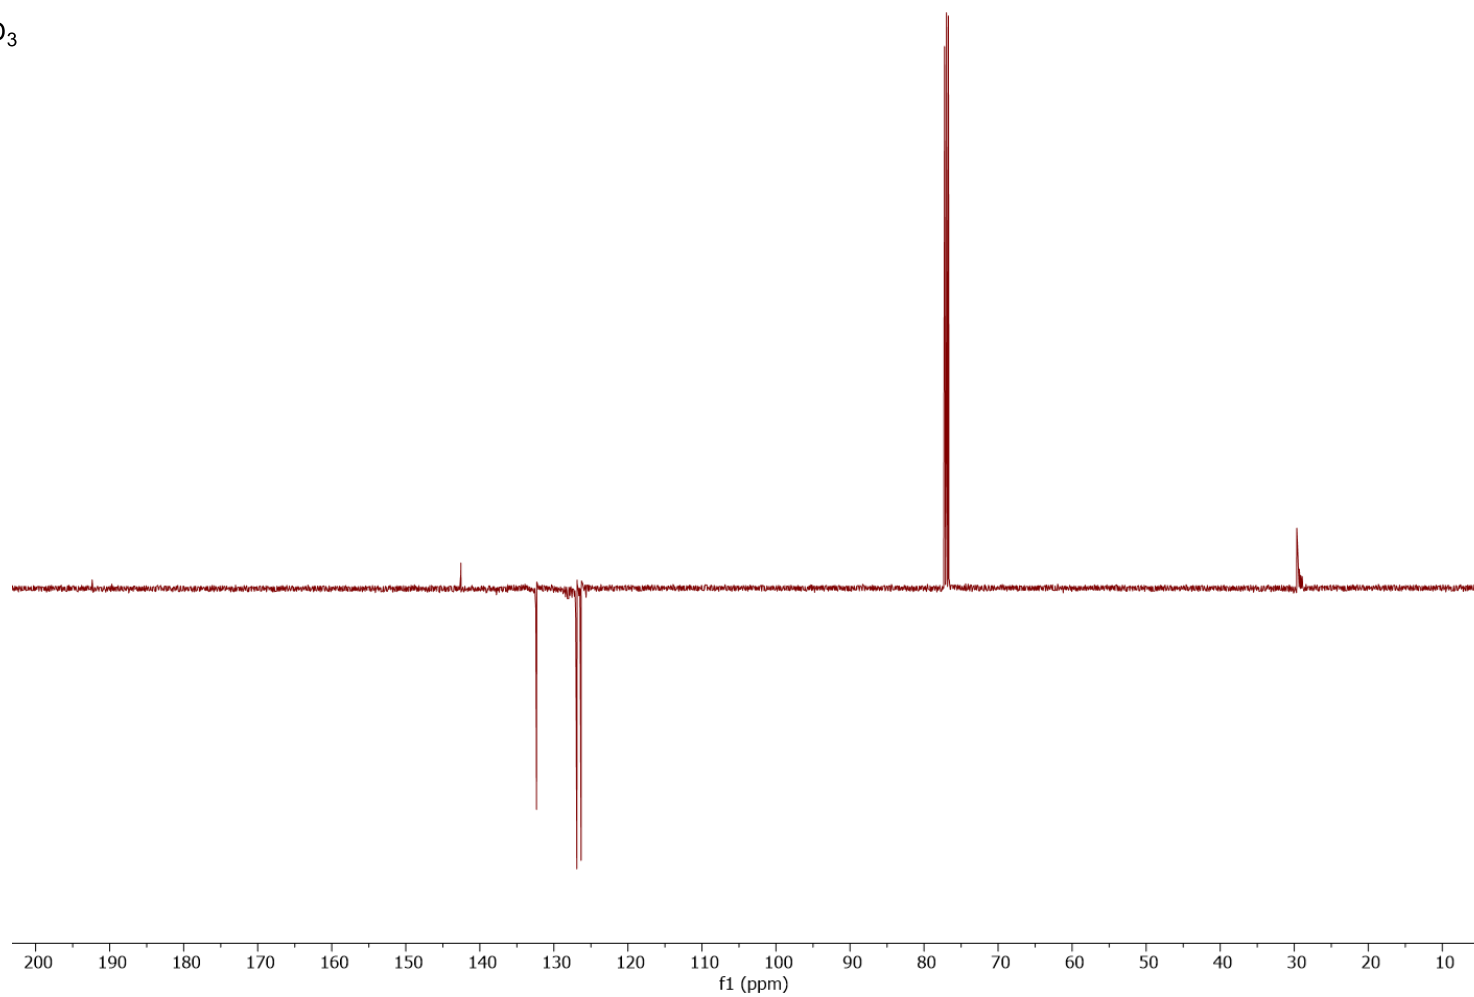

**Figure S30.**  $^{13}\text{C}$  NMR spectrum of 1-(thiophen-3-yl)ethan-1-one-2,2,2-d<sub>3</sub>

### 3. References

- 1 D. T. Genna, G. H. Posner, *Org. Lett.*, **2011**, *13*, 5358-5361
- 2 G. Oss, J. Ho, T. V. Nguyen, *Eur. J. Org. Chem.*, **2018**, *29*, 3974-3981
- 3 F. Li, N. Wang, L. Lu, G. Zhu, *J. Org. Chem.* **2015**, *80*, 7, 3538–3546]
- 4 K. Fujita, R. Tamura, Y. Tanaka, M. Yoshida, M. Onoda, R. Yamaguchi *ACS Catal.*, **2017**, *7*, 7226–7230
- 5 G. L. Sorella, L. Sporni, P. Ballester, G. Strukul, A. Scarso, *Catal. Sci. Technol.*, **2016**, *6*, 6031-6036
- 6 R. Das, D. Chakraborty, *Appl. Organometal. Chem.*, **2012**, *26*, 722-726
- 7 W. Liu, H. Wang, CJ. Li, *Organic Letters*, **2016**, *18*, 2184-2187
- 8 M. Hassam, WS. Li, *Tetrahedron*, **2015**, *71*, 2719-2723
- 9 M. Głodek, A. Makal, P. Paluch, M. Kadziolka-Gaweł, Y. Kobayashi, J. Zakrzewski, D. Plażuk, *Dalton Trans.*, **2018**, **47**, 6702-6712
- 10 A. Lopalco, G. Dalwadi, S. Niu, R. L. Schowen, Justin Douglas, V. J. Stella, *J. Pharm. Sci.*, **2016**, *105*, 705-713
- 11 Y. M. A. Yamada, C. K. Jin, Y. Uozumi, *Org. Lett.*, **2010**, *12*, 4540–4543
- 12 R. Giles, G. Ahn, K. W. Jung *Tetrahedron Letters*, **2015**, *56*, 6231–6235
